# Supplementary material for: Functionalization of 2-Mercapto-5-methyl-1,3,4-thiadiazole: 2-(ω-Haloalkylthio) Thiadiazoles vs. Symmetrical Bis-Thiadiazoles
Source: MDPI journal article supplement (doi:10.3390/molecules29091938), 2024-04-24
Supplement: s1 [file s1]

## Supporting Information

### Functionalization of 2-mercapto-5-methyl-1,3,4-thiadiazole: 2-( $\omega$ -haloalkylthio)-thiadiazoles vs symmetrical bis-thiadiazoles

Zhanina S. Petkova,<sup>a</sup> Rusi I. Rusew,<sup>b</sup> Boris L. Shivachev,<sup>b\*</sup> and Vanya B. Kurteva<sup>a\*</sup>

<sup>a</sup> Institute of Organic Chemistry with Centre of Phytochemistry, Bulgarian Academy of Sciences, Acad. G. Bonchev str., bl. 9, 1113 Sofia, Bulgaria; vanya.kurteva@orgchm.bas.bg

<sup>b</sup> Institute of Mineralogy and Crystallography “Acad. Ivan Kostov”, Bulgarian Academy of Sciences, Acad. G. Bonchev str., bl. 107, 1113 Sofia, Bulgaria; blshivachev@gmail.com

#### Table of content

| Content                                            | Page |
|----------------------------------------------------|------|
| Table S1                                           | 2    |
| Table S2                                           | 3    |
| Figure S1                                          | 4    |
| Figure S2                                          | 4    |
| <b>Section S1</b>                                  | 5    |
| NMR spectra of compound <b>3a</b>                  | 5    |
| NMR spectra of compound <b>4a</b>                  | 7    |
| NMR spectra of compound <b>5a</b>                  | 9    |
| NMR spectra of compound <b>6</b>                   | 11   |
| NMR spectra of compound <b>7</b>                   | 12   |
| NMR spectra of compound <b>8</b>                   | 14   |
| NMR spectra of compound <b>9</b>                   | 16   |
| NMR spectra of compound <b>10</b>                  | 18   |
| NMR spectra of compound <b>2b</b>                  | 19   |
| NMR spectra of compound <b>4b</b>                  | 21   |
| NMR spectra of compound <b>5b</b>                  | 23   |
| IR (ATR) spectra of the products                   | 25   |
| HR-MS (HESI <sup>+</sup> ) spectra of the products | 31   |

**Table S1.** Methylene groups' signals in the NMR spectra of the products.

| Compd.    | CH <sub>2</sub> -S | CH <sub>2</sub> -C-S | CH <sub>2</sub> -C-X    | CH <sub>2</sub> -X |
|-----------|--------------------|----------------------|-------------------------|--------------------|
| <b>2b</b> | 5.252/47.29        |                      |                         |                    |
| <b>6</b>  | 5.197/36.88        |                      |                         |                    |
| <b>3a</b> | 3.724/35.18        |                      |                         | 3.743/29.69        |
| <b>3b</b> | 3.648/35.36        |                      |                         | 3.901/42.33        |
| <b>7</b>  | 3.759/33.30        |                      |                         |                    |
| <b>4a</b> | 3.451/32.09        | 2.372/31.72          |                         | 3.551/31.66        |
| <b>4b</b> | 3.453/30.89        | 2.293/31.69          |                         | 3.692/43.12        |
| <b>8</b>  | 3.445/32.39        | 2.328/28.63          |                         |                    |
| <b>5a</b> | 3.337/32.97        | 1.970/27.78          | 2.032/31.47             | 3.438/32.76        |
| <b>5b</b> | 3.337/33.13        | 1.945 (common)/26.54 | 1.945<br>(common)/31.33 | 3.573/44.24        |
| <b>9</b>  | 3.333/33.29        | 1.968/28.20          |                         |                    |

**Table S2.** Most important data collection and crystallographic refinement parameters for compounds **2b** (as HCl salt), **6**, **7** and **9**.

| Compound                                                  | <b>2b (HCl)</b>                                                             | <b>6</b>                                                    | <b>7</b>                                                     | <b>9</b>                                                      |
|-----------------------------------------------------------|-----------------------------------------------------------------------------|-------------------------------------------------------------|--------------------------------------------------------------|---------------------------------------------------------------|
| Empirical formula                                         | C <sub>4</sub> H <sub>6</sub> Cl <sub>2</sub> N <sub>2</sub> S <sub>2</sub> | C <sub>7</sub> H <sub>8</sub> N <sub>4</sub> S <sub>4</sub> | C <sub>8</sub> H <sub>10</sub> N <sub>4</sub> S <sub>4</sub> | C <sub>10</sub> H <sub>14</sub> N <sub>4</sub> S <sub>4</sub> |
| Formula weight                                            | 217.13                                                                      | 276.41                                                      | 290.44                                                       | 318.49                                                        |
| Temperature/K                                             | 290                                                                         | 290                                                         | 295.00                                                       | 290.00                                                        |
| Crystal system                                            | Monoclinic                                                                  | Monoclinic                                                  | Monoclinic                                                   | Triclinic                                                     |
| Space group                                               | <i>P</i> 2 <sub>1</sub> / <i>c</i>                                          | <i>P</i> 2 <sub>1</sub> / <i>c</i>                          | <i>P</i> 2 <sub>1</sub> / <i>c</i>                           | <i>P</i> − <i>I</i>                                           |
| <i>a</i> /Å                                               | 8.3182(6)                                                                   | 13.6976(9)                                                  | 12.3542(11)                                                  | 5.640(3)                                                      |
| <i>b</i> /Å                                               | 11.8171(7)                                                                  | 5.6120(3)                                                   | 5.4771(5)                                                    | 6.849(4)                                                      |
| <i>c</i> /Å                                               | 9.5657(6)                                                                   | 16.5588(11)                                                 | 9.8294(8)                                                    | 9.469(6)                                                      |
| $\alpha$ /°                                               | 90                                                                          | 90                                                          | 90                                                           | 99.56(2)                                                      |
| $\beta$ /°                                                | 114.594(9)                                                                  | 114.237(2)                                                  | 113.270(2)                                                   | 103.889(19)                                                   |
| $\gamma$ /°                                               | 90                                                                          | 90                                                          | 90                                                           | 90.88(2)                                                      |
| Volume/Å <sup>3</sup>                                     | 854.98(11)                                                                  | 1160.69(13)                                                 | 611.00(9)                                                    | 349.5(4)                                                      |
| <i>Z</i>                                                  | 4                                                                           | 4                                                           | 2                                                            | 1                                                             |
| $\rho_{\text{calc}}$ /cm <sup>3</sup>                     | 1.687                                                                       | 1.582                                                       | 1.579                                                        | 1.513                                                         |
| $\mu$ /mm <sup>−1</sup>                                   | 1.174                                                                       | 0.790                                                       | 0.754                                                        | 0.667                                                         |
| <i>F</i> (000)                                            | 440.0                                                                       | 568.0                                                       | 300.0                                                        | 166.0                                                         |
| Crystal size/mm <sup>3</sup>                              | 0.35×0.35×0.35                                                              | 0.4×0.1×0.08                                                | 0.22 × 0.2 × 0.15                                            | 0.22 × 0.19 × 0.18                                            |
| Radiation                                                 | Mo <i>K</i> α<br>$\lambda$ = 0.71073                                        | Mo <i>K</i> α<br>$\lambda$ = 0.71073                        | Mo <i>K</i> α<br>$\lambda$ = 0.71073                         | Mo <i>K</i> α<br>$\lambda$ = 0.71073                          |
| 2 $\Theta$ range for data collection/°                    | 5.816 – 58.898                                                              | 5.396 to 50.752                                             | 8.262 to 52.852                                              | 4.5 to 52.996                                                 |
| Reflections collected/independent                         | 4819/2089                                                                   | 30650/2116                                                  | 16853/1248                                                   | 4686/1422                                                     |
| Index ranges $R_{\text{int}} I \geq 2\sigma(I)$ /all data | 0.0267/0.0308                                                               | 0.0491/0.0190                                               | 0.0536/0.0349                                                | 0.0322/0.0335                                                 |
| Reflections/restraints/parameters                         | 2089/0/97                                                                   | 2116/0/139                                                  | 1248/0/83                                                    | 1422/0/83                                                     |
| Goodness-of-fit on $F^2$                                  | 1.039                                                                       | 1.064                                                       | 1.080                                                        | 1.161                                                         |
| Final <i>R</i> indexes [ $I \geq 2\sigma(I)$ ]            | $R_1 = 0.0274$ ,<br>$wR_2 = 0.0692$                                         | $R_1 = 0.0297$ ,<br>$wR_2 = 0.0687$                         | $R_1 = 0.0392$ ,<br>$wR_2 = 0.0970$                          | $R_1 = 0.0504$ ,<br>$wR_2 = 0.1140$                           |
| Final <i>R</i> indexes [all data]                         | $R_1 = 0.0331$ ,<br>$wR_2 = 0.0741$                                         | $R_1 = 0.0345$ ,<br>$wR_2 = 0.0722$                         | $R_1 = 0.0409$ ,<br>$wR_2 = 0.0991$                          | $R_1 = 0.0596$ ,<br>$wR_2 = 0.1178$                           |
| Largest diff. peak/hole/e Å <sup>−3</sup>                 | 0.29/−0.29                                                                  | 0.52/−0.49                                                  | 0.49/−0.30                                                   | 0.48/−0.35                                                    |
| COD number                                                | 3000465                                                                     | 3000466                                                     | 3000493                                                      | 3000494                                                       |

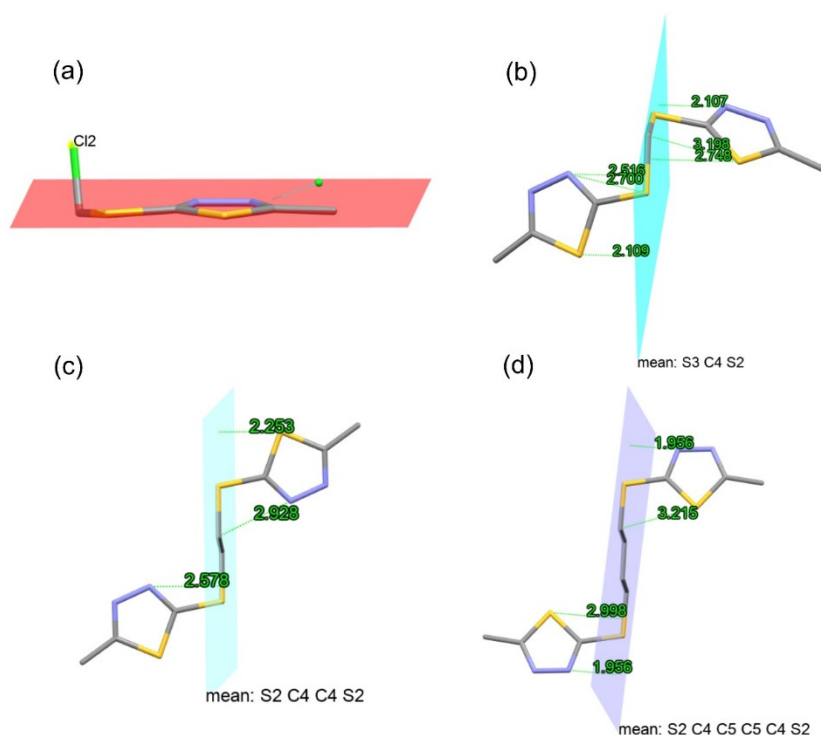

**Figure S1.** Depiction of (a) the observed planarity of the 1,3,4-thiadiazole motif in **2b** (b) the different rotation of the 1,3,4-thiadiazole moiety with respect to the S–C–S spacer plane in **6**, (c) and (d) the “analogical” orientation of the 1,3,4-thiadiazole motif with respect to the S–C–C–S and S–C–C–C–S planes in **7** and **9** although in **7** the N atoms are interacting with the spacer while in **9** the S atoms are the interacting with the spacer.

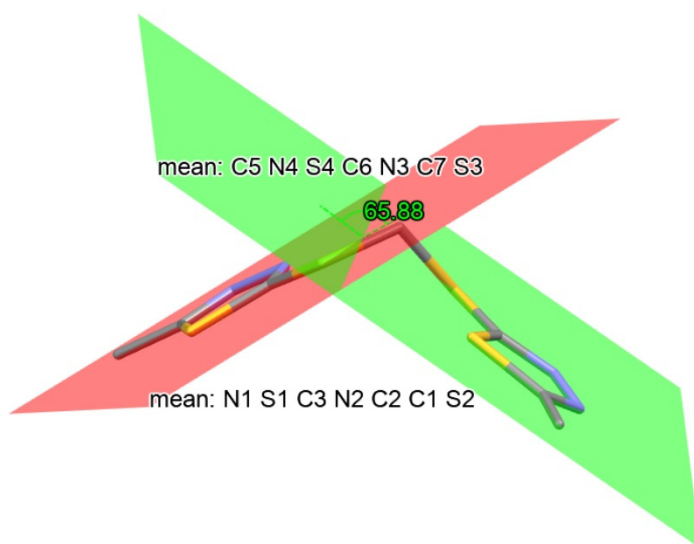

**Figure S2.** Depiction of the molecular geometry of **6** disclosing the planarity of the 1,3,4-thiadiazole ring and the angle their relative orientation (angle between the mean planes of 65.88°).

## Section S1

### NMR spectra of compound **3a**

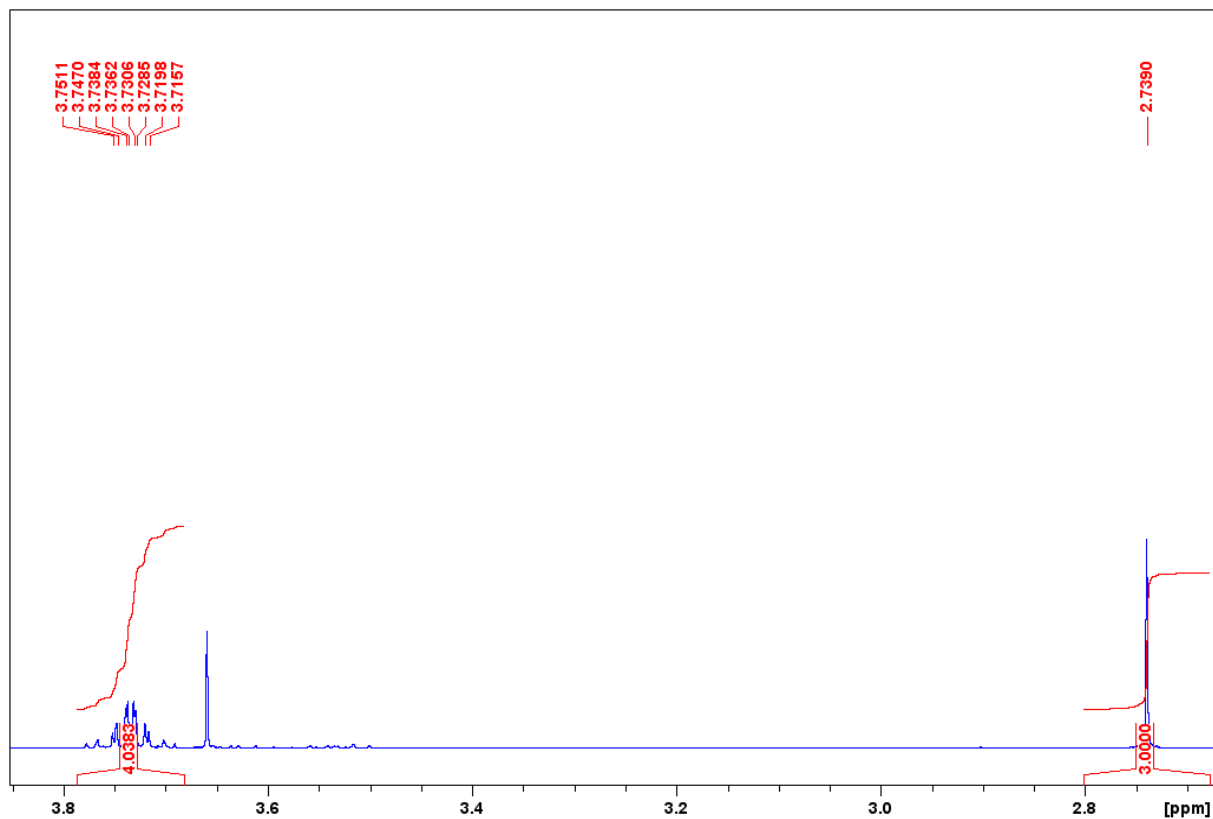

<sup>1</sup>H NMR spectrum of compound **3a**.

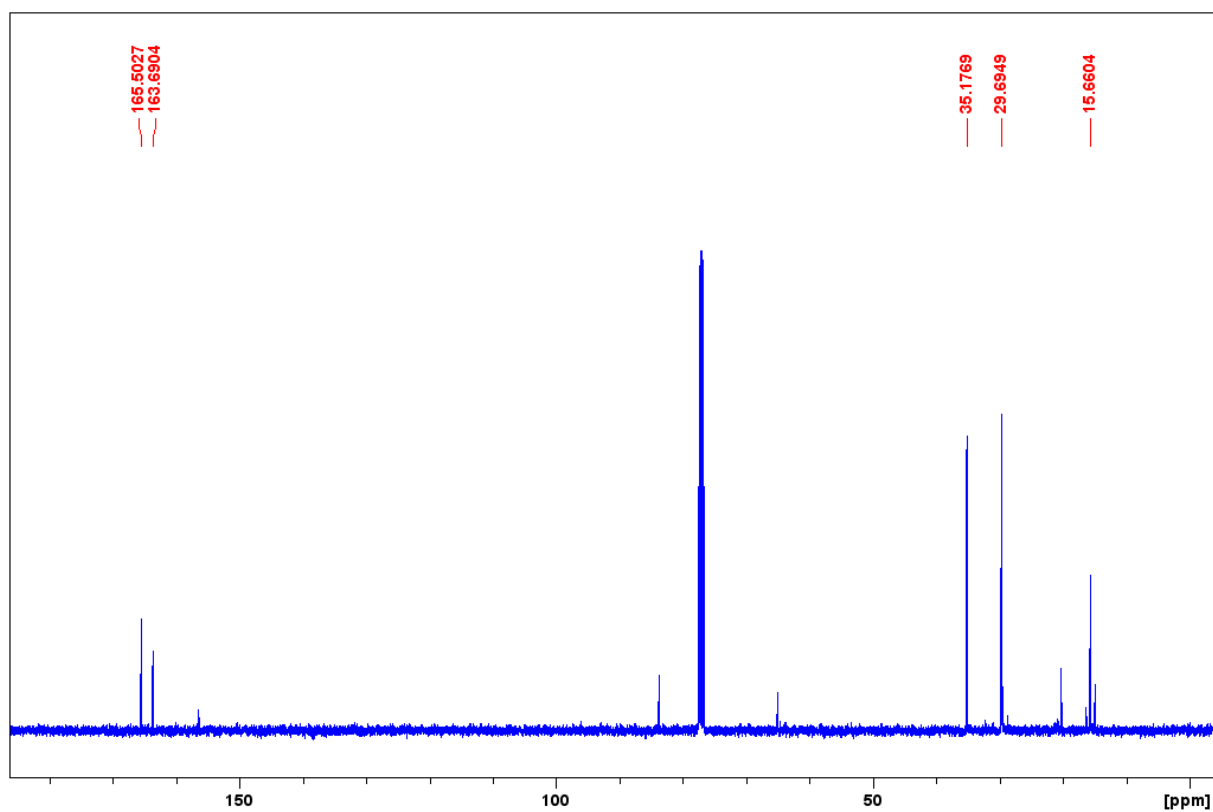

<sup>13</sup>C NMR spectrum of compound **3a**.

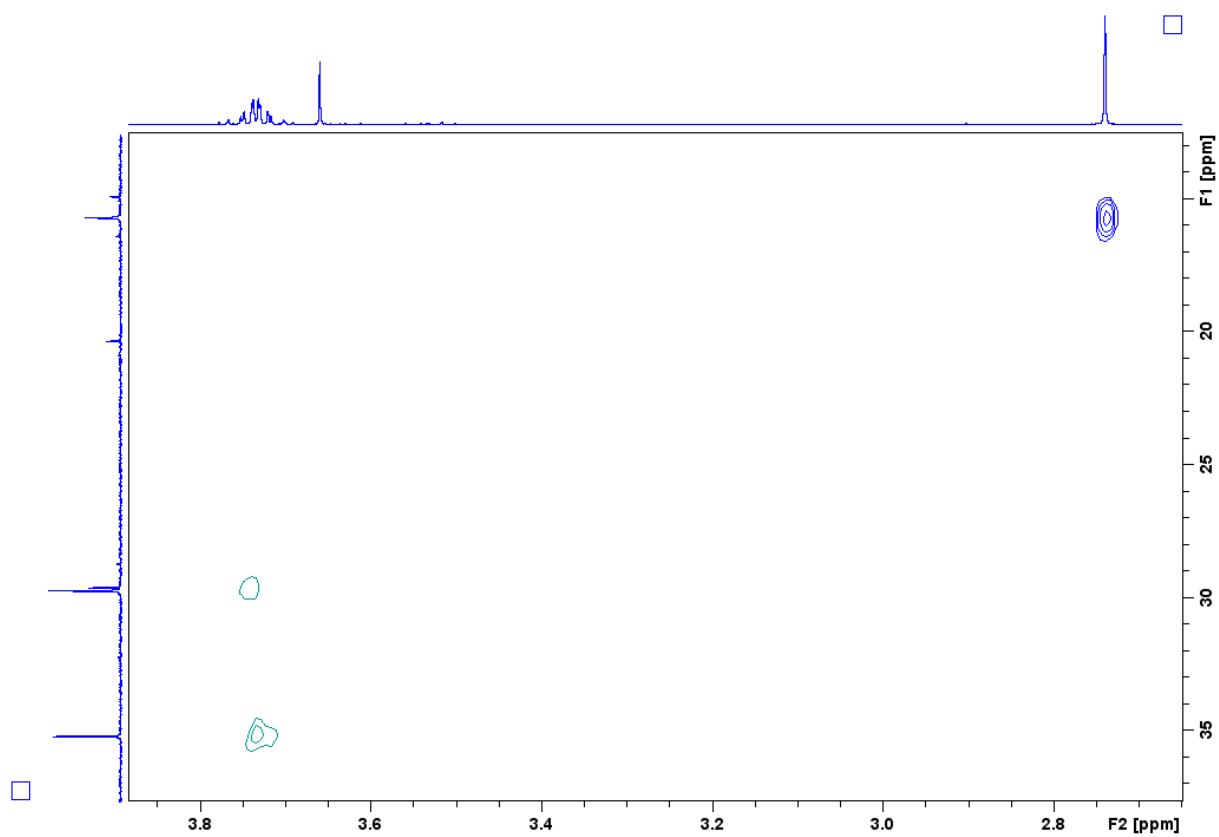

$^1\text{H}$ - $^{13}\text{C}$  HSQC spectrum of compound **3a**.

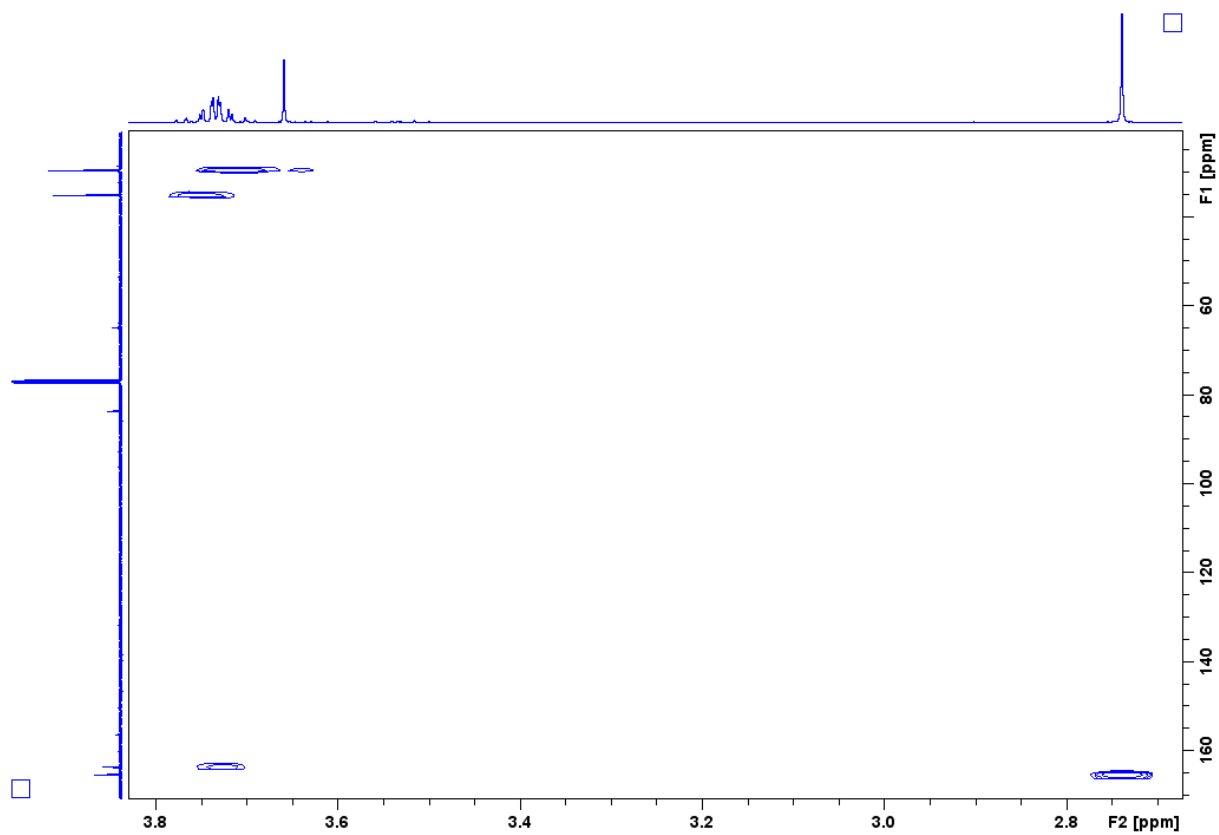

$^1\text{H}$ - $^{13}\text{C}$  HMBC spectrum of compound **3a**.

## NMR spectra of compound 4a

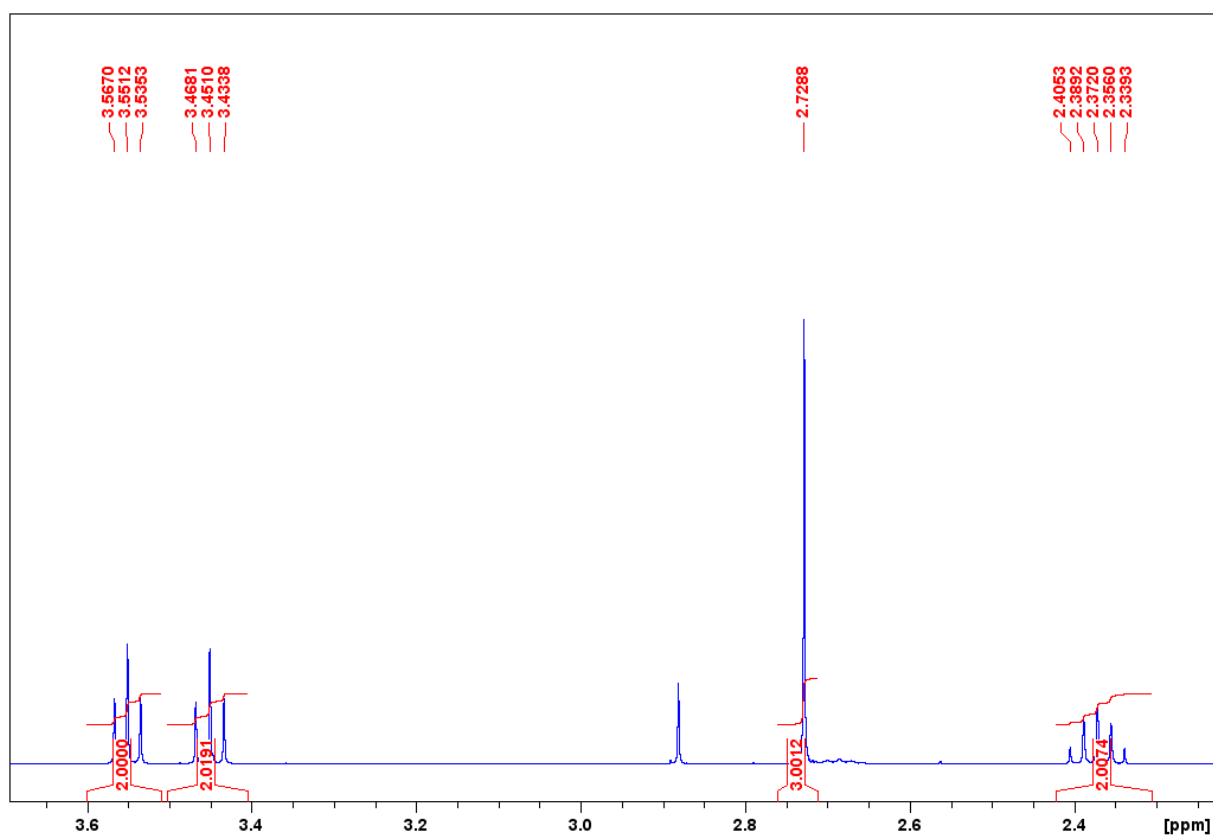

<sup>1</sup>H NMR spectrum of compound 4a.

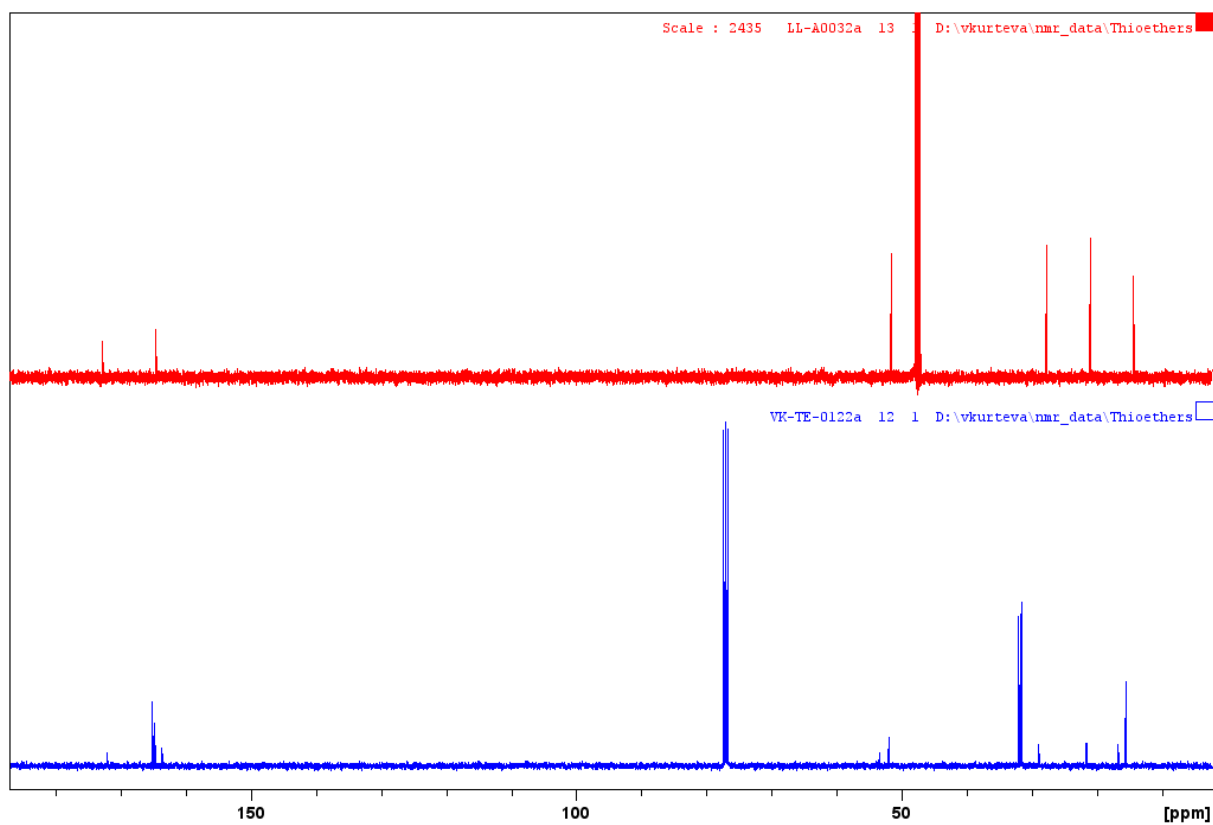

<sup>13</sup>C NMR spectrum of compound 4a; contaminated sample in CDCl<sub>3</sub> (blue) and pure one in CD<sub>3</sub>OD (red).

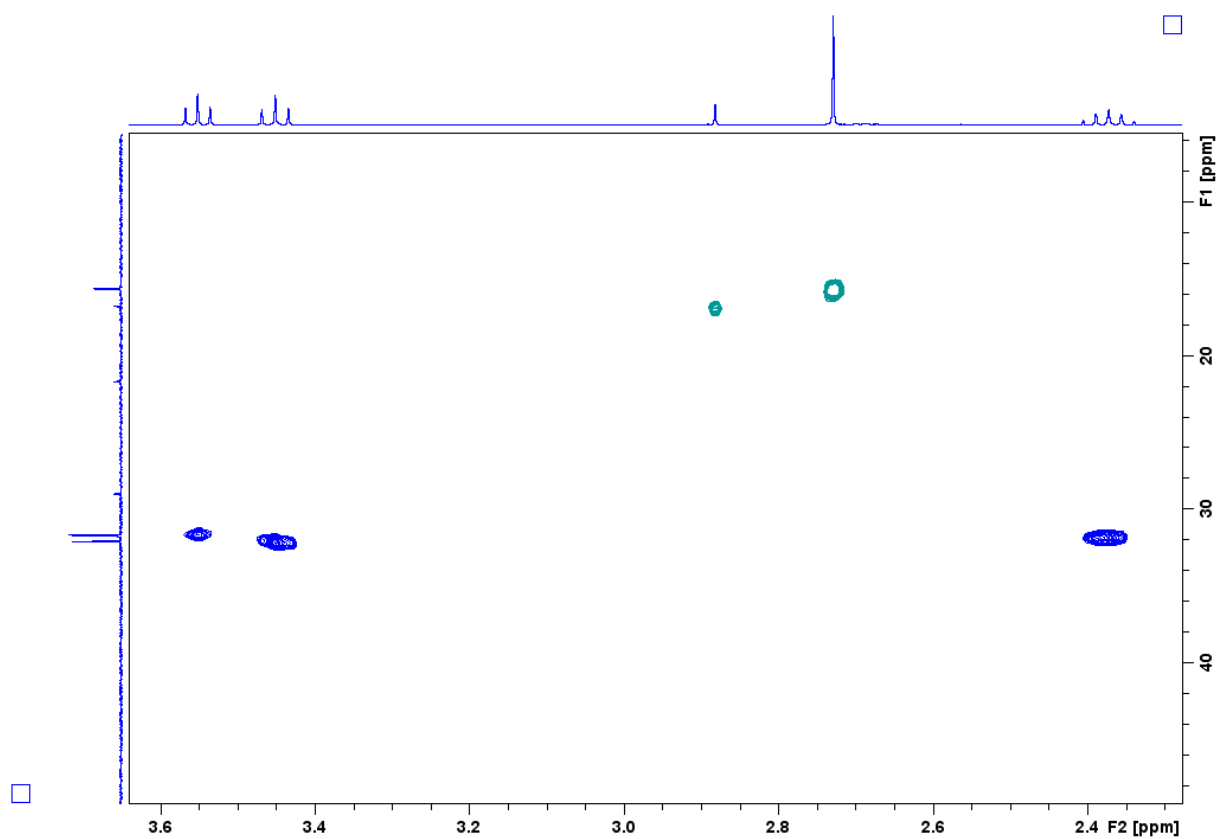

$^1\text{H}$ - $^{13}\text{C}$  HSQC spectrum of compound **4a**.

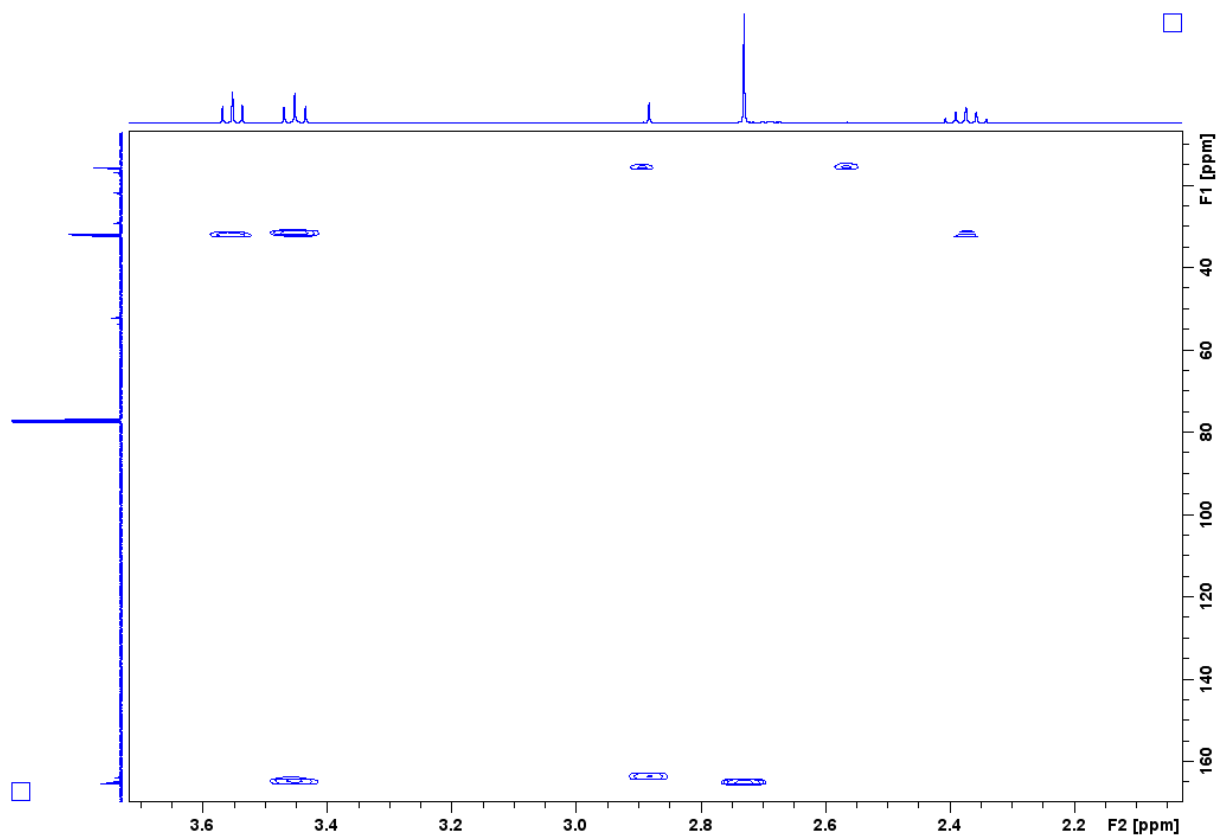

$^1\text{H}$ - $^{13}\text{C}$  HMBC spectrum of compound **4a**.



## NMR spectra of compound **5a**

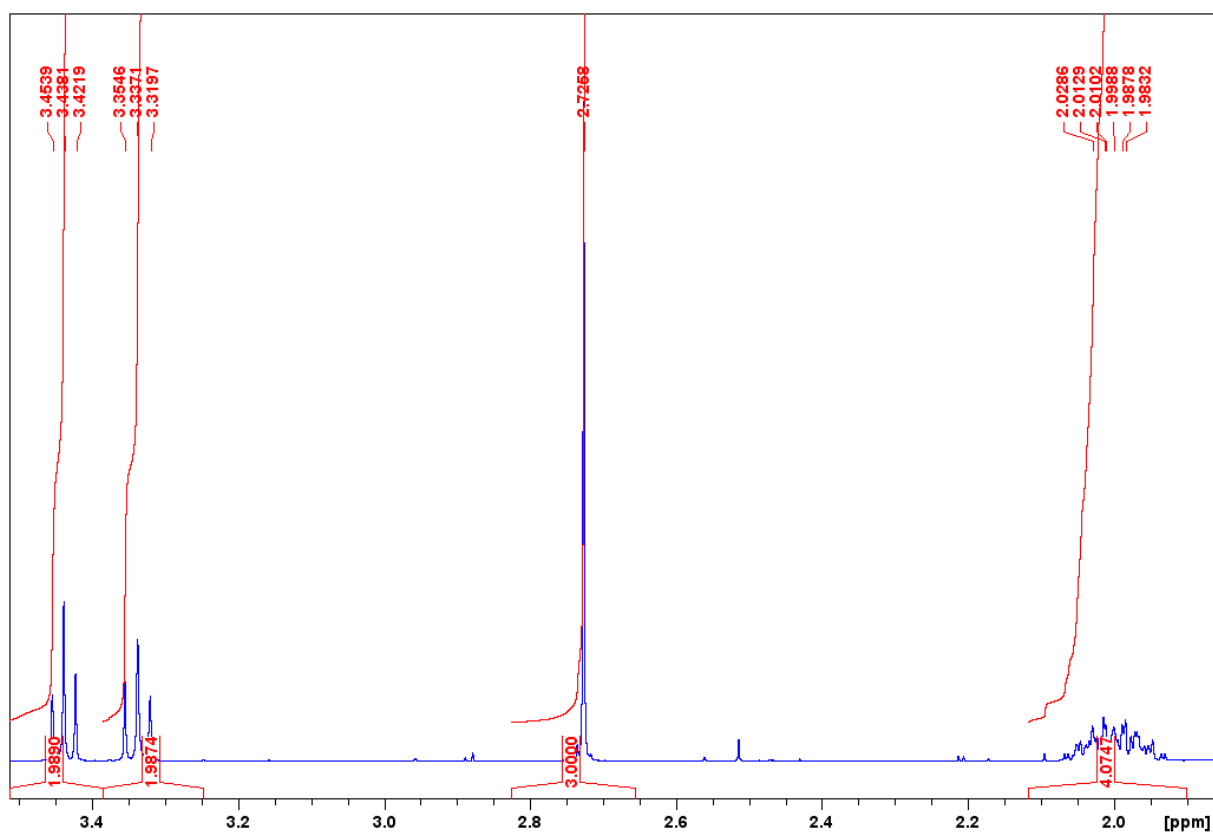

<sup>1</sup>H NMR spectrum of compound **5a**.

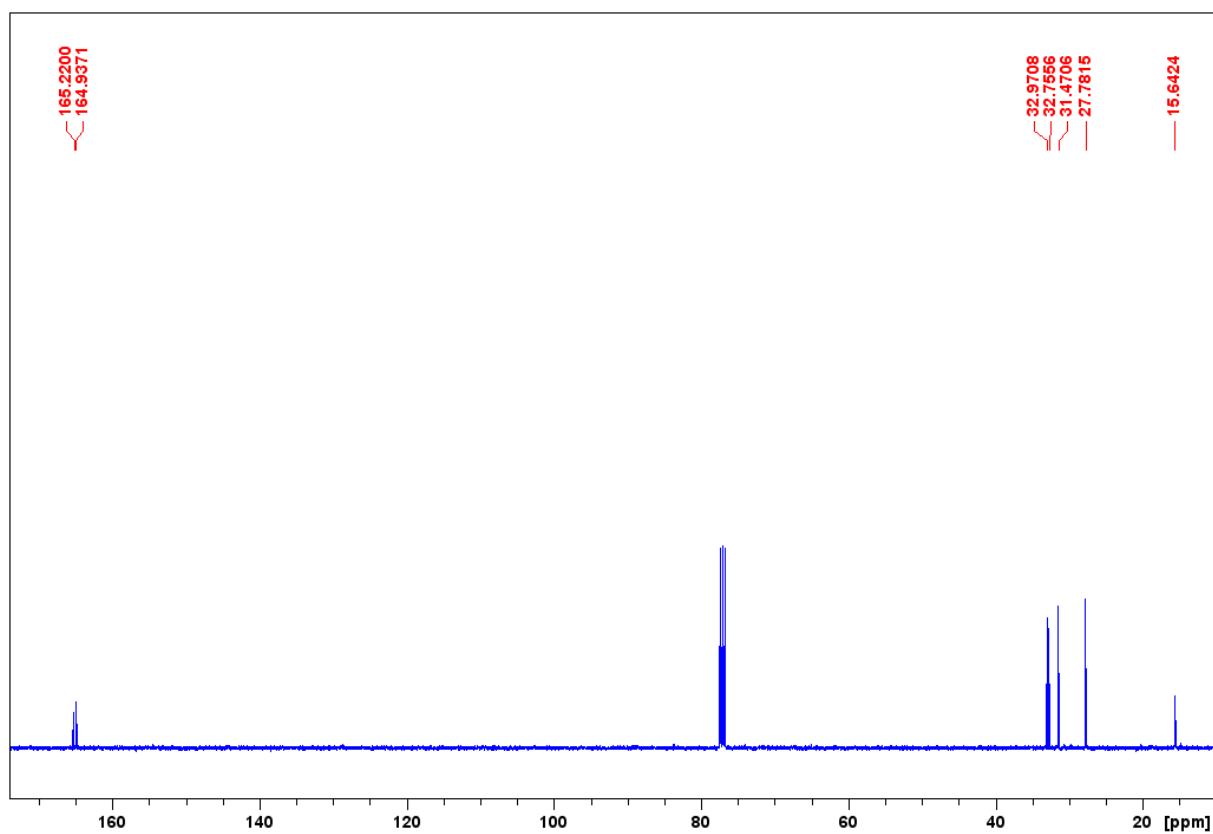

<sup>13</sup>C NMR spectrum of compound **5a**.

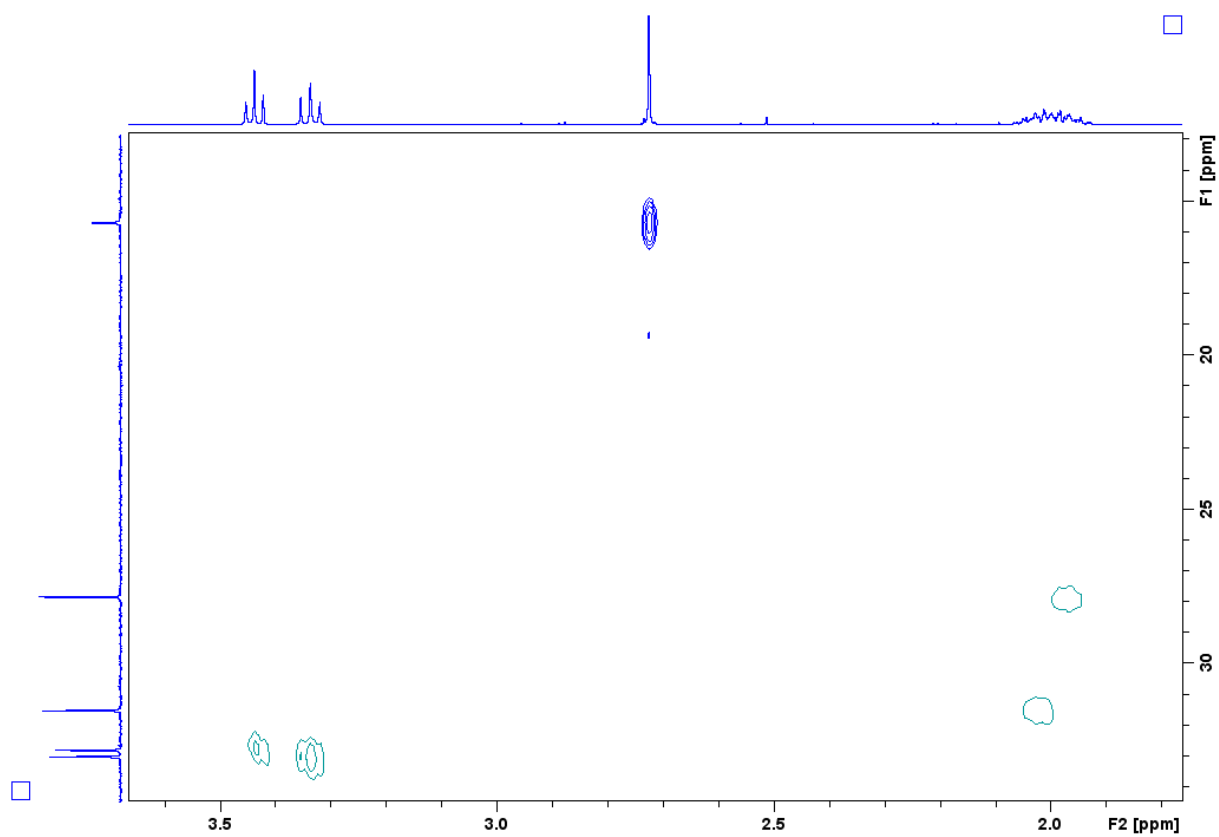

$^1\text{H}$ - $^{13}\text{C}$  HSQC spectrum of compound **5a**.

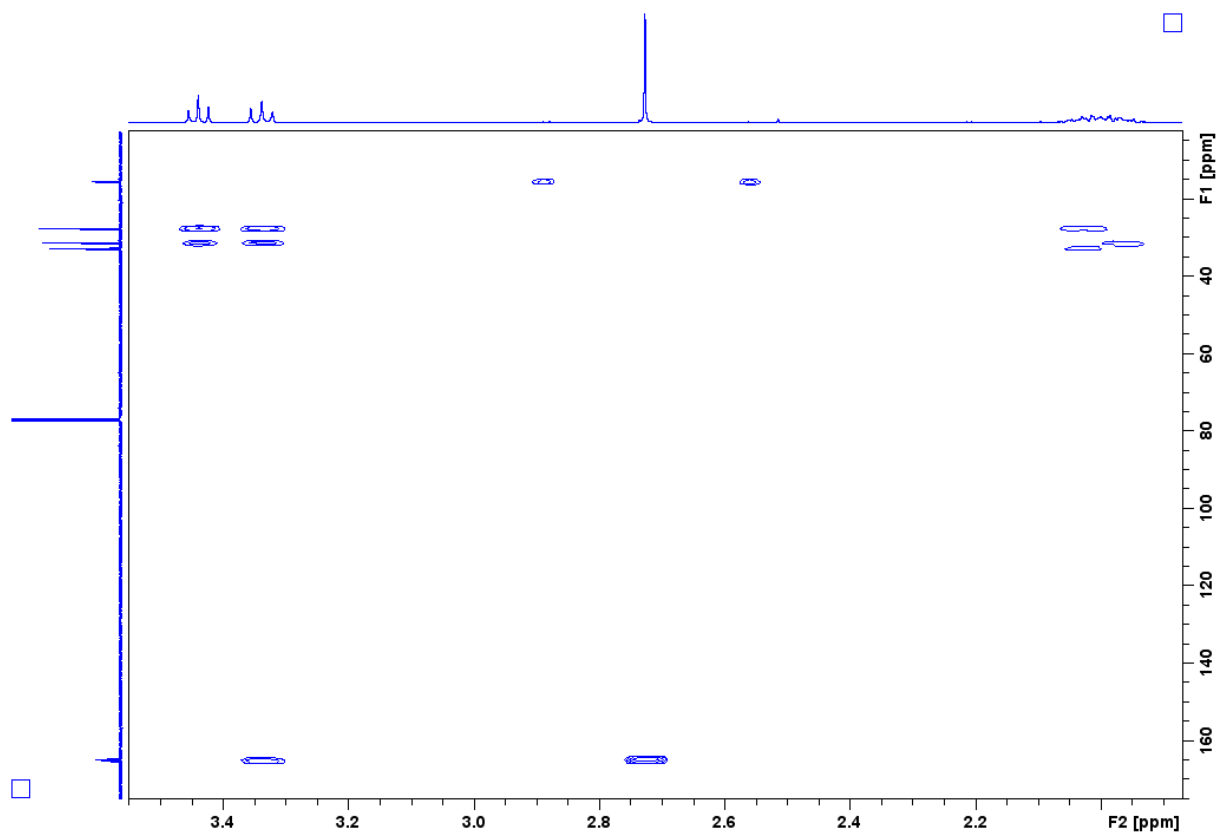

$^1\text{H}$ - $^{13}\text{C}$  HMBC spectrum of compound **5a**.

## NMR spectra of compound 6

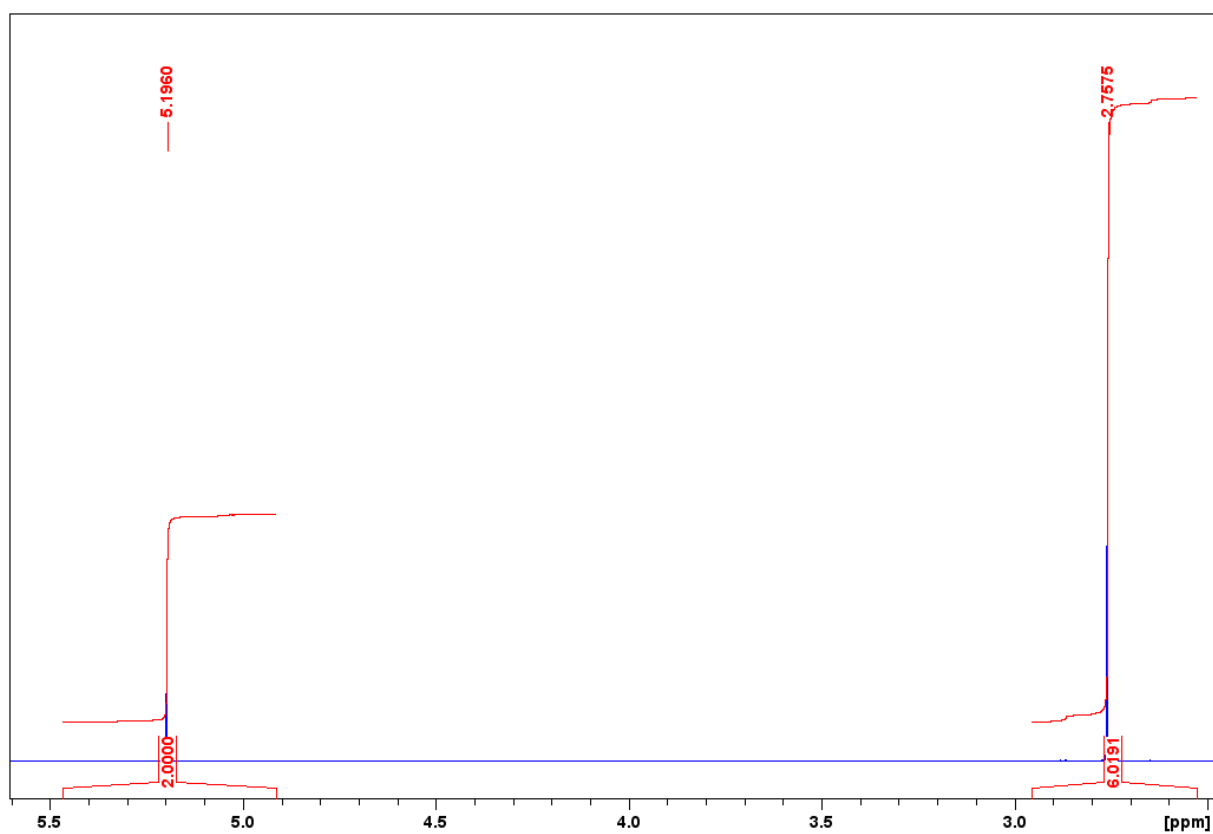

<sup>1</sup>H NMR spectrum of compound 6.

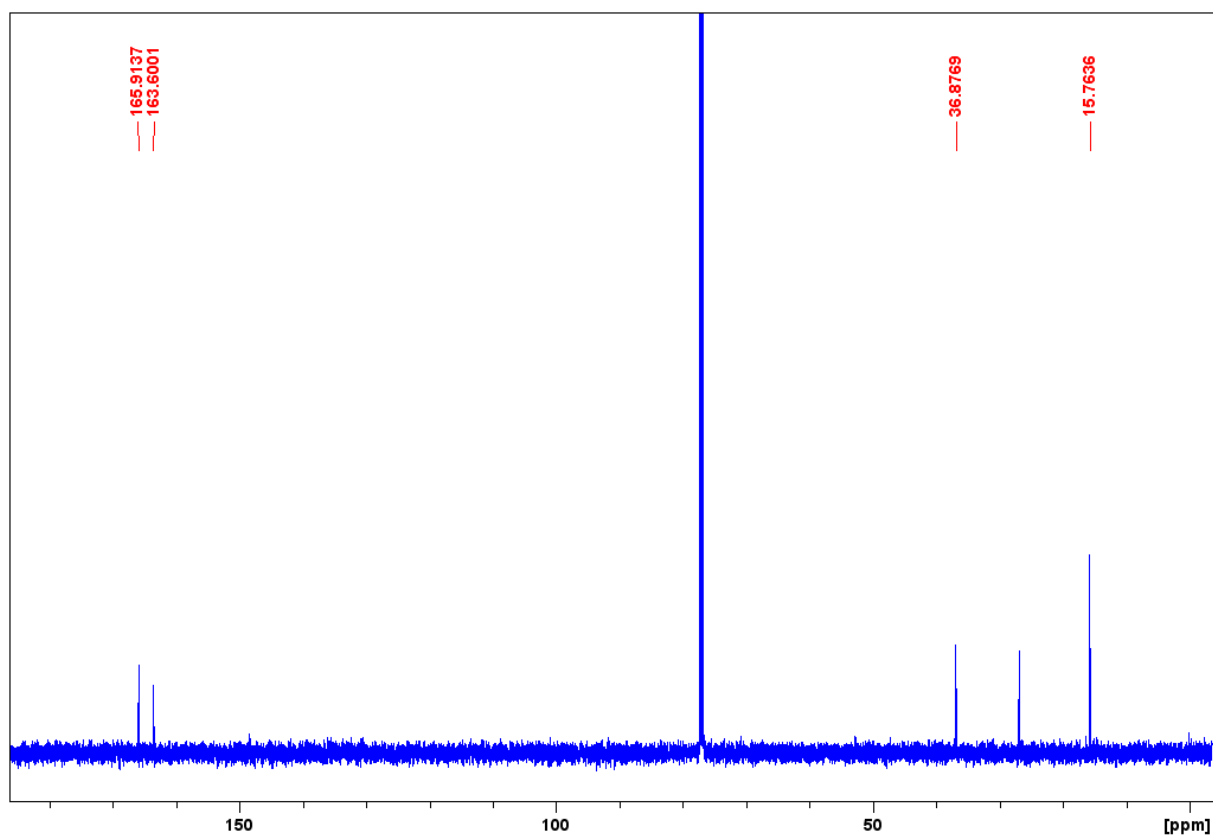

<sup>13</sup>C NMR spectrum of compound 6.

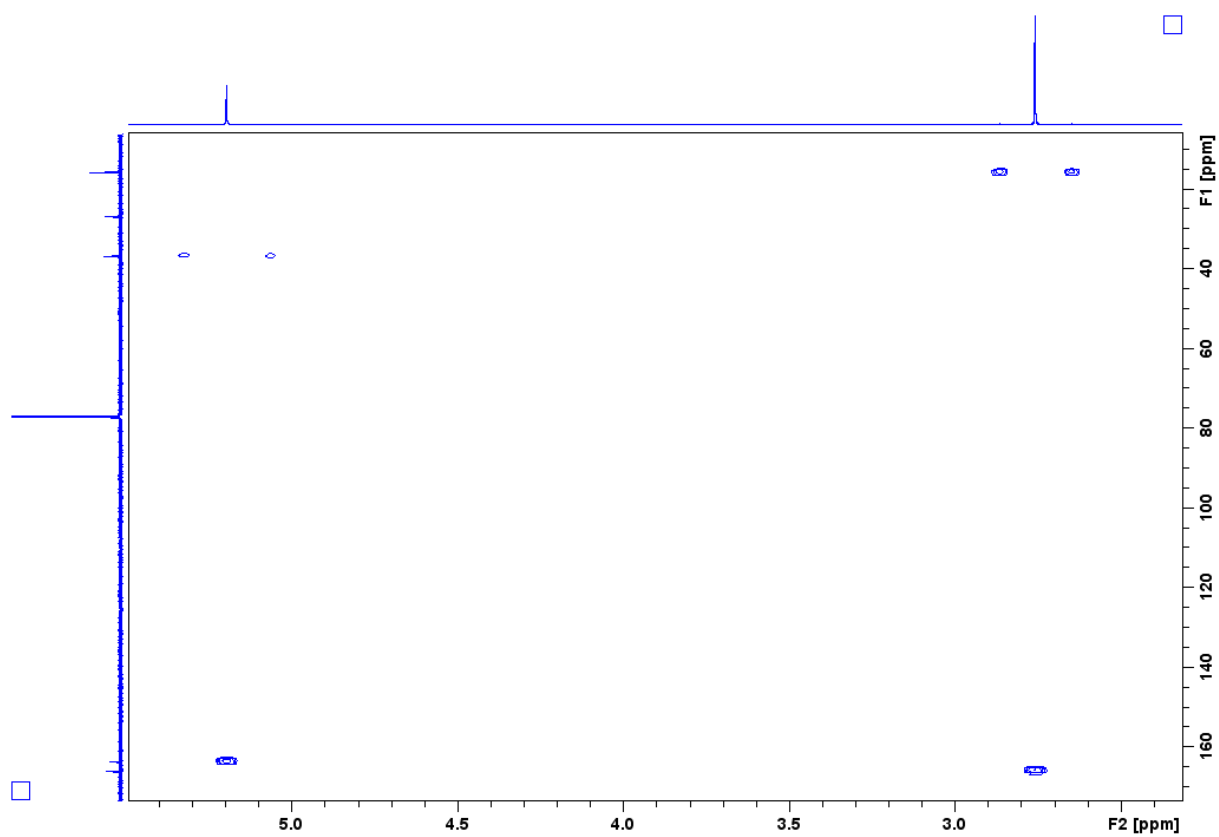

$^1\text{H}$ - $^{13}\text{C}$  HMBC spectrum of compound **6**.

### NMR spectra of compound **7**

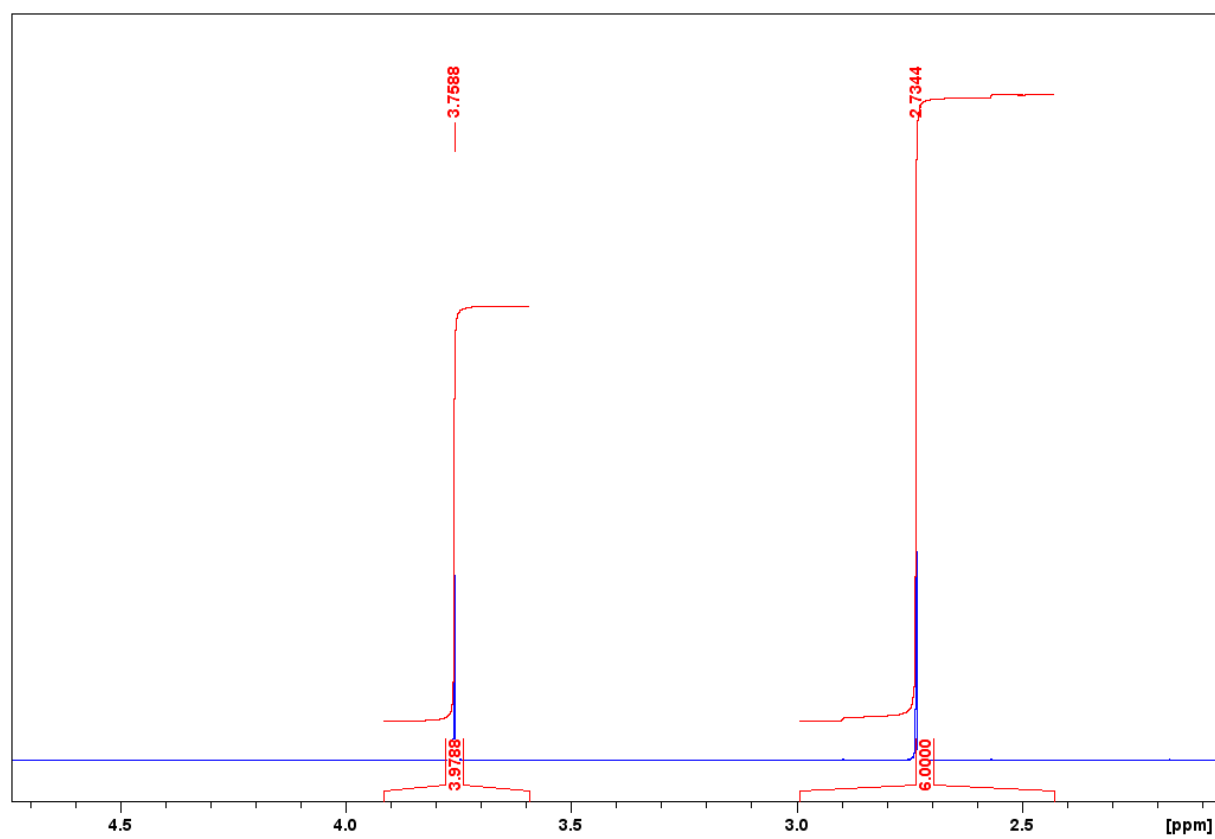

$^1\text{H}$  NMR spectrum of compound **7**.

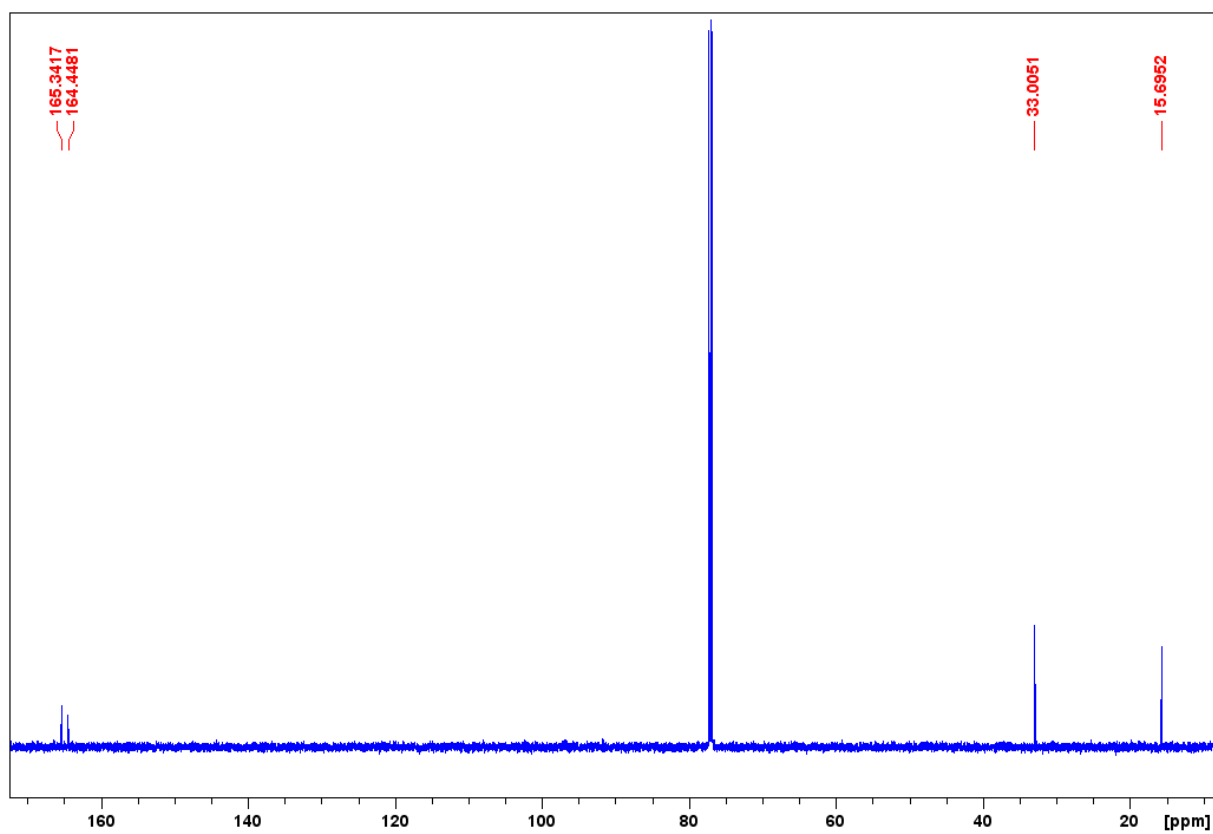

<sup>13</sup>C NMR spectrum of compound 7.

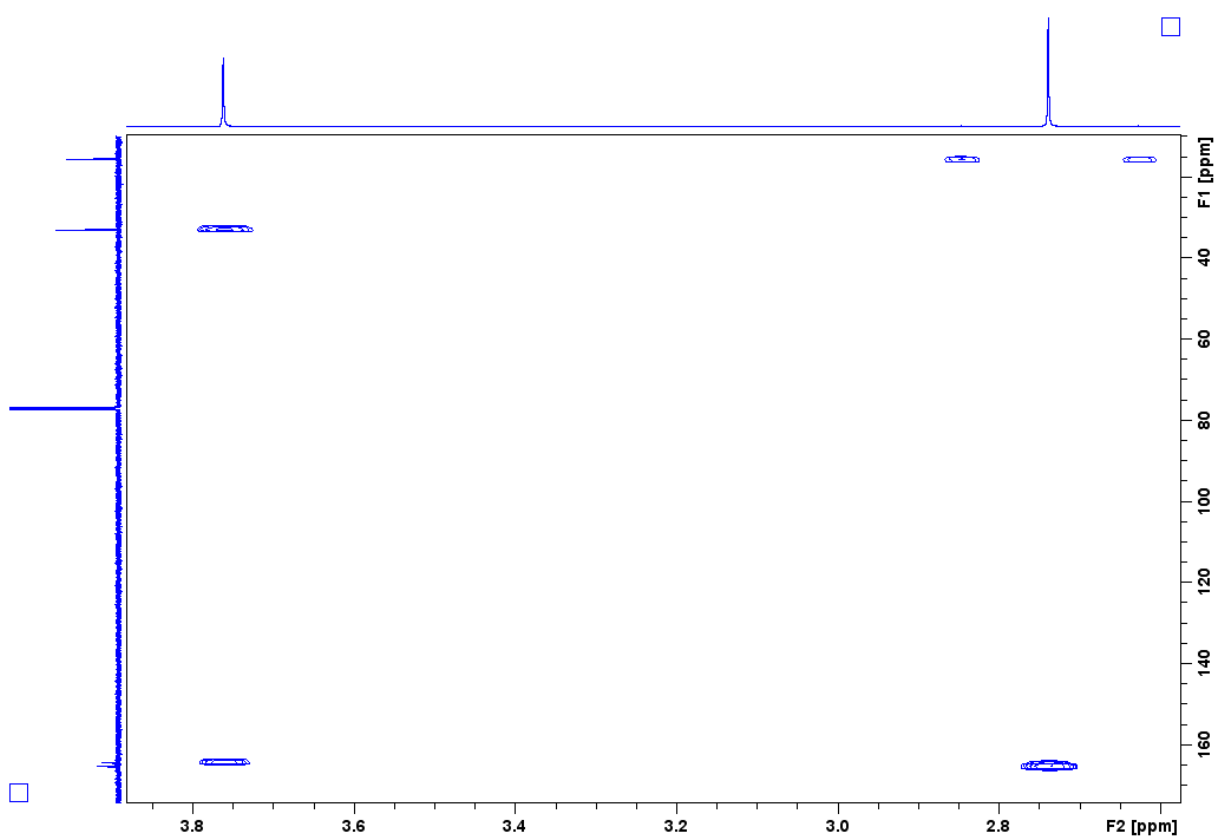

<sup>1</sup>H-<sup>13</sup>C HMBC spectrum of compound 7.

## NMR spectra of compound 8

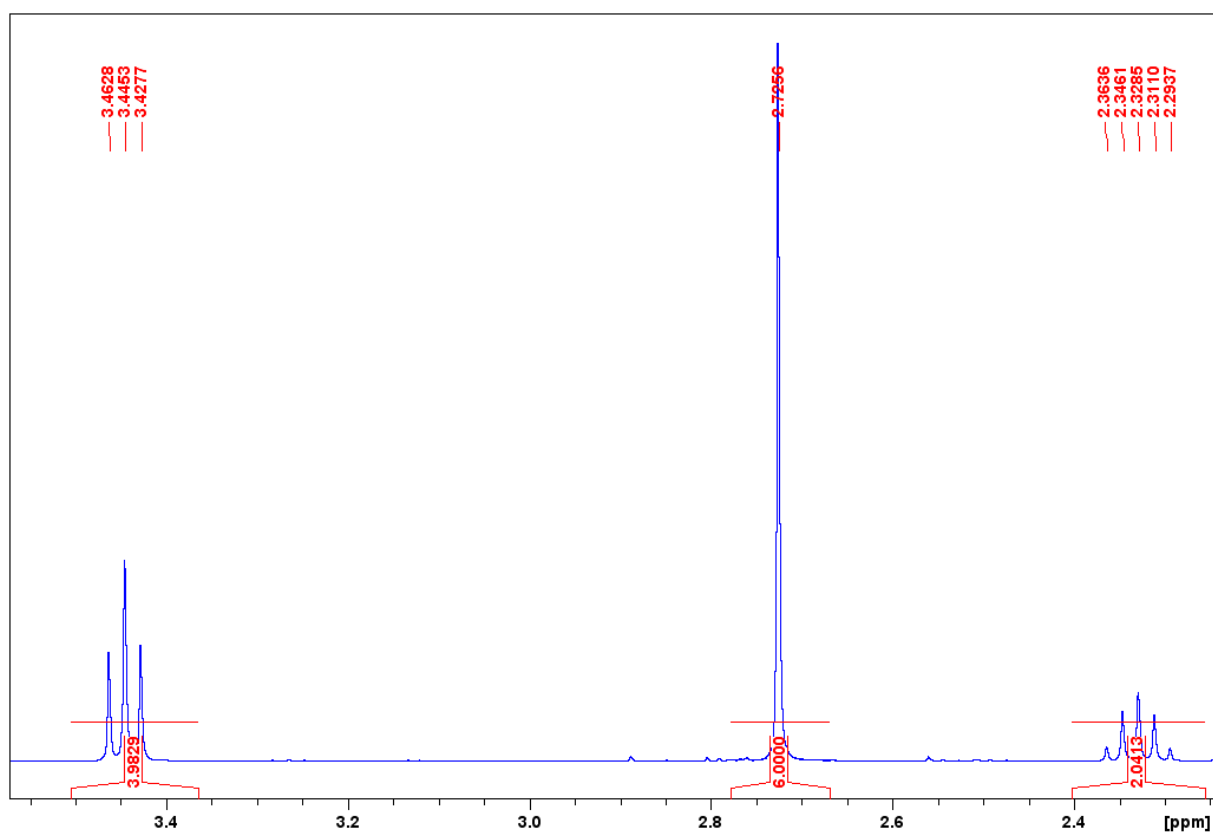

<sup>1</sup>H NMR spectrum of compound 8.

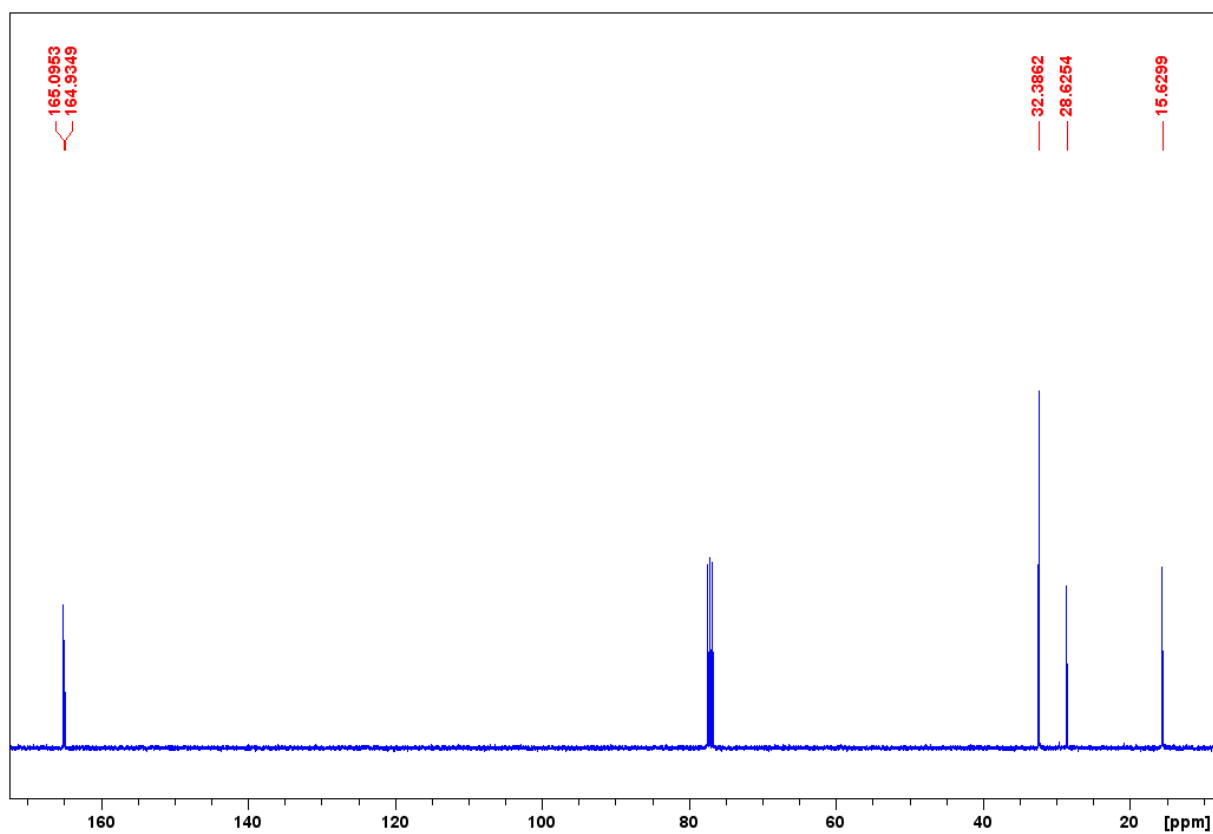

<sup>13</sup>C NMR spectrum of compound 8.

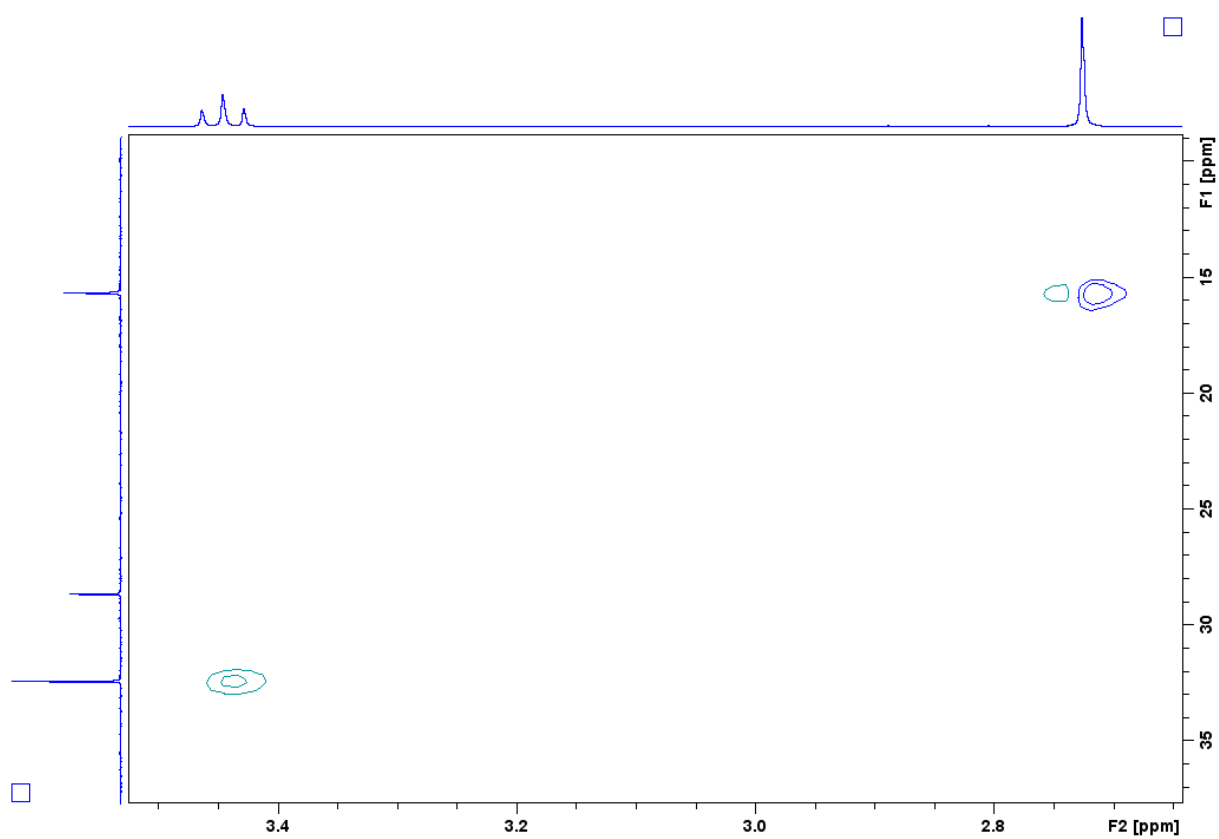

$^1\text{H}$ - $^{13}\text{C}$  HSQC spectrum of compound **8**.

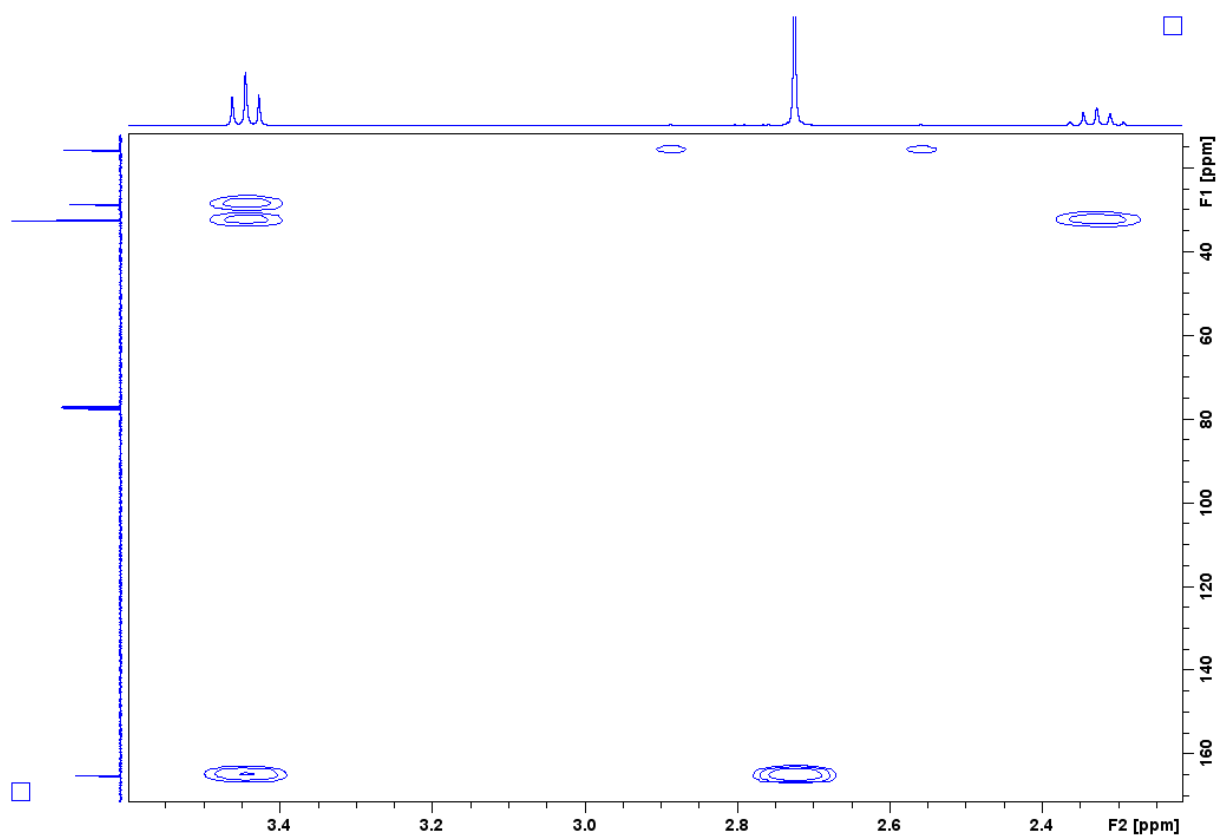

$^1\text{H}$ - $^{13}\text{C}$  HMBC spectrum of compound **8**.

## NMR spectra of compound 9

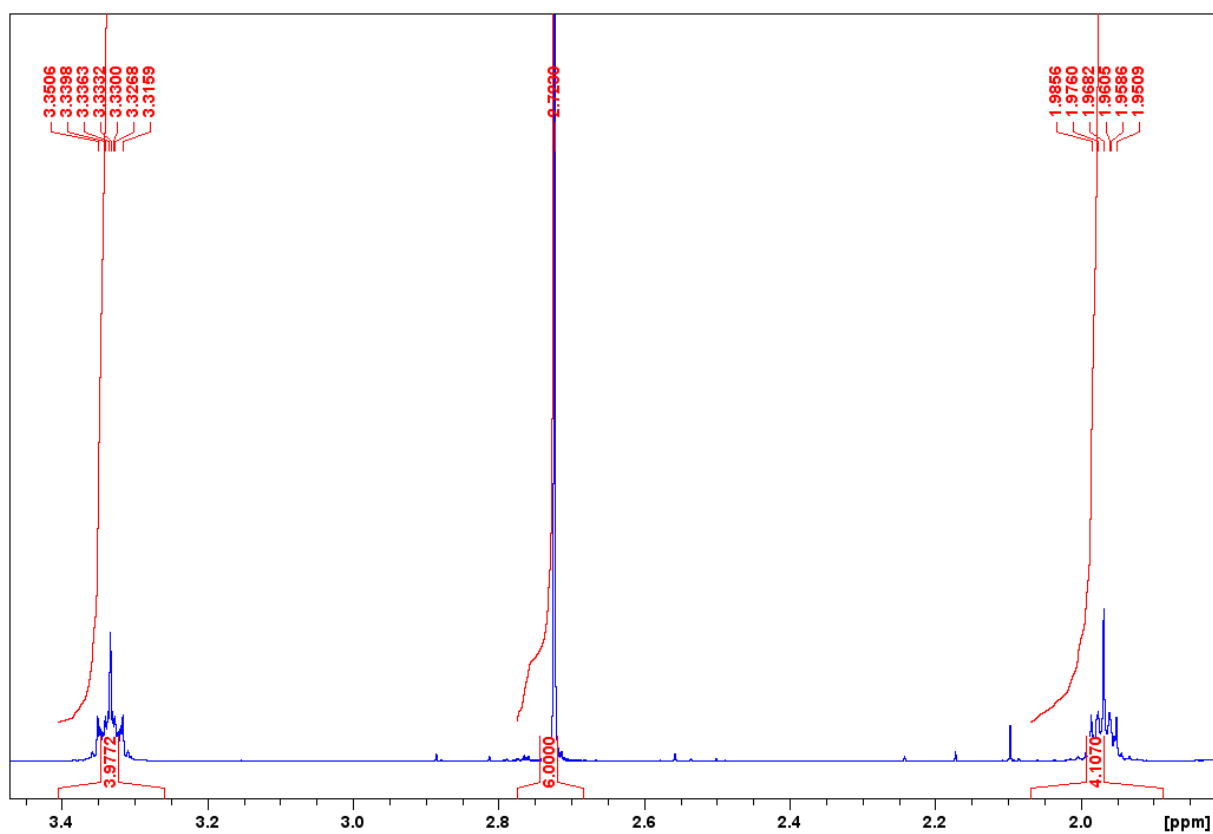

<sup>1</sup>H NMR spectrum of compound 9.

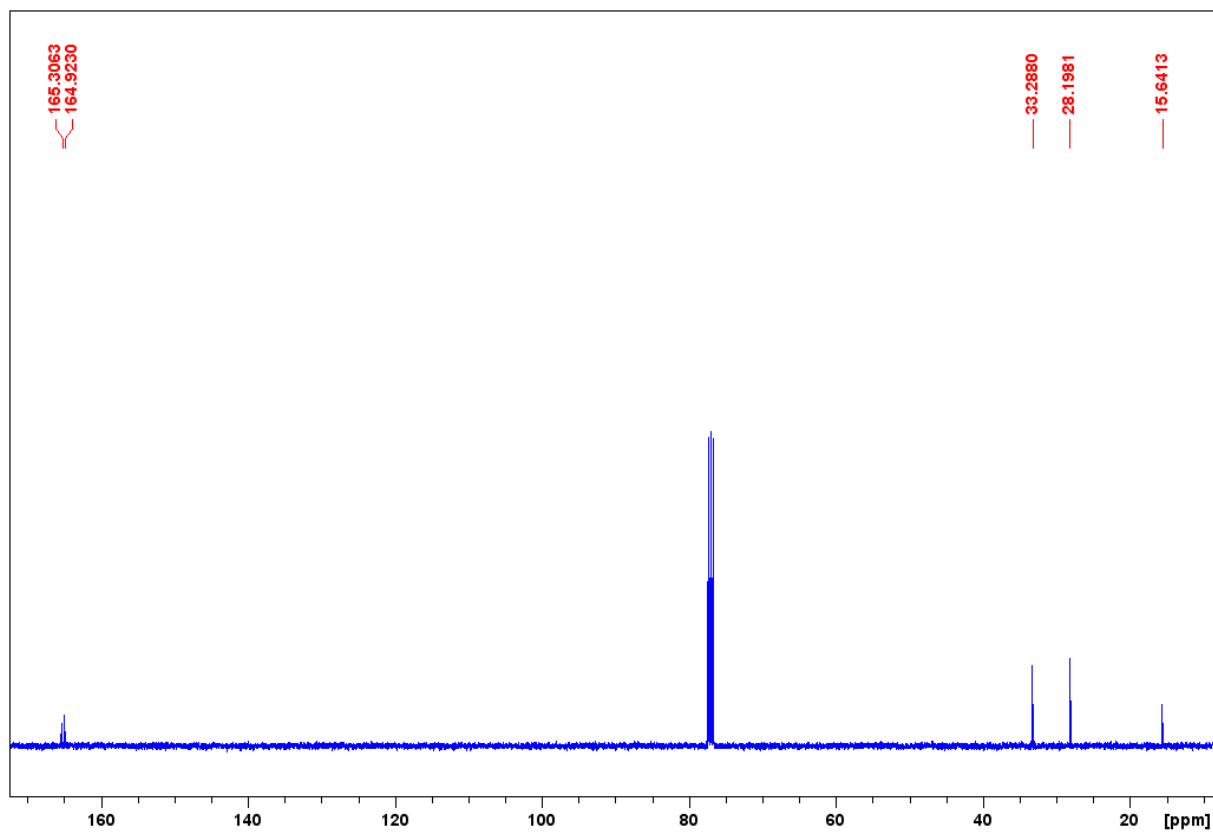

<sup>13</sup>C NMR spectrum of compound 9.



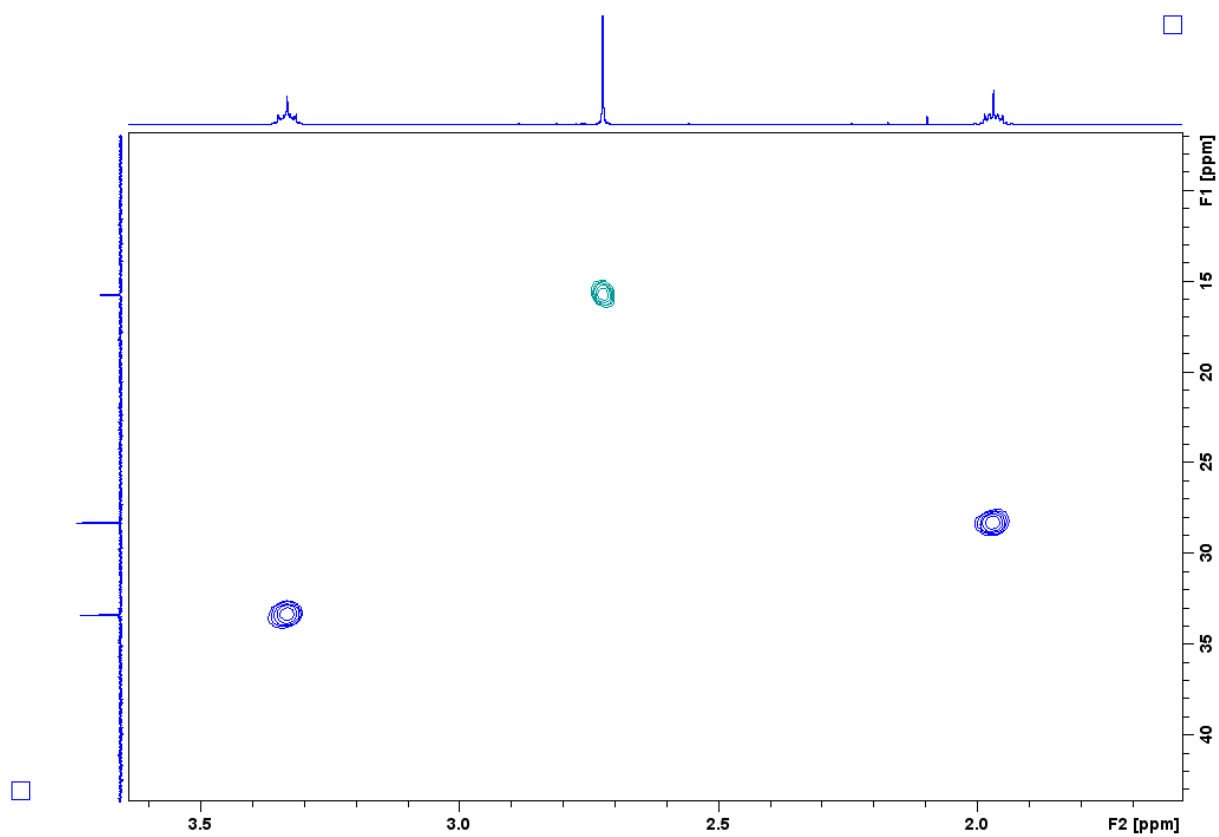

$^1\text{H}$ - $^{13}\text{C}$  HSQC spectrum of compound 9.

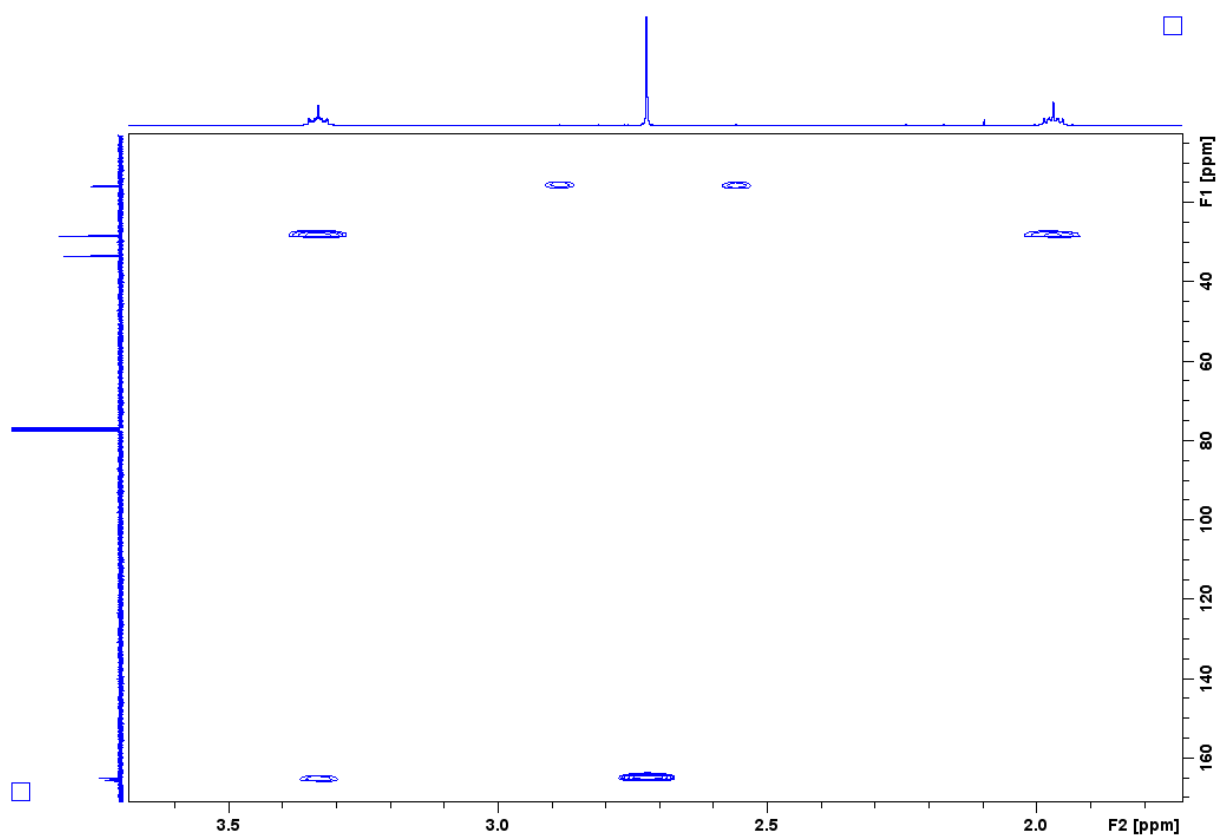

$^1\text{H}$ - $^{13}\text{C}$  HMBC spectrum of compound 9.

## NMR spectra of compound 10

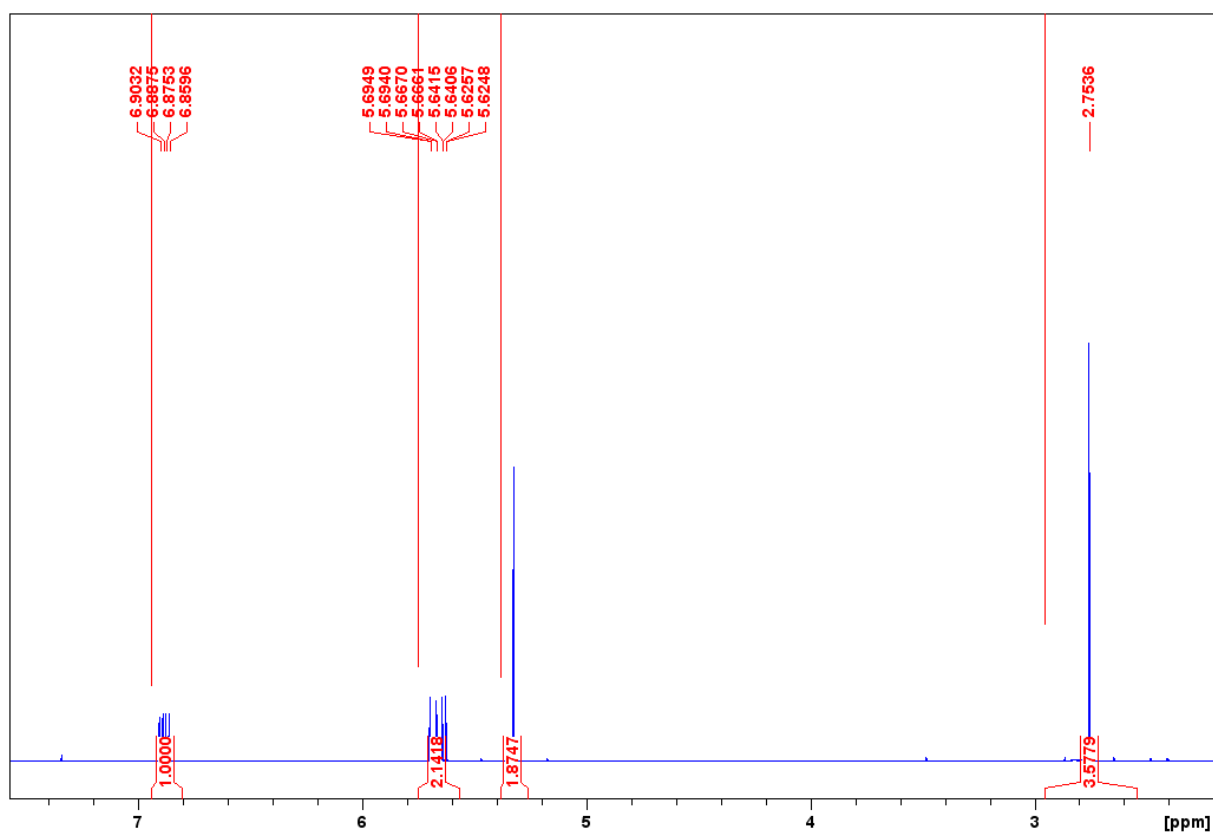

<sup>1</sup>H NMR spectrum of compound 10.

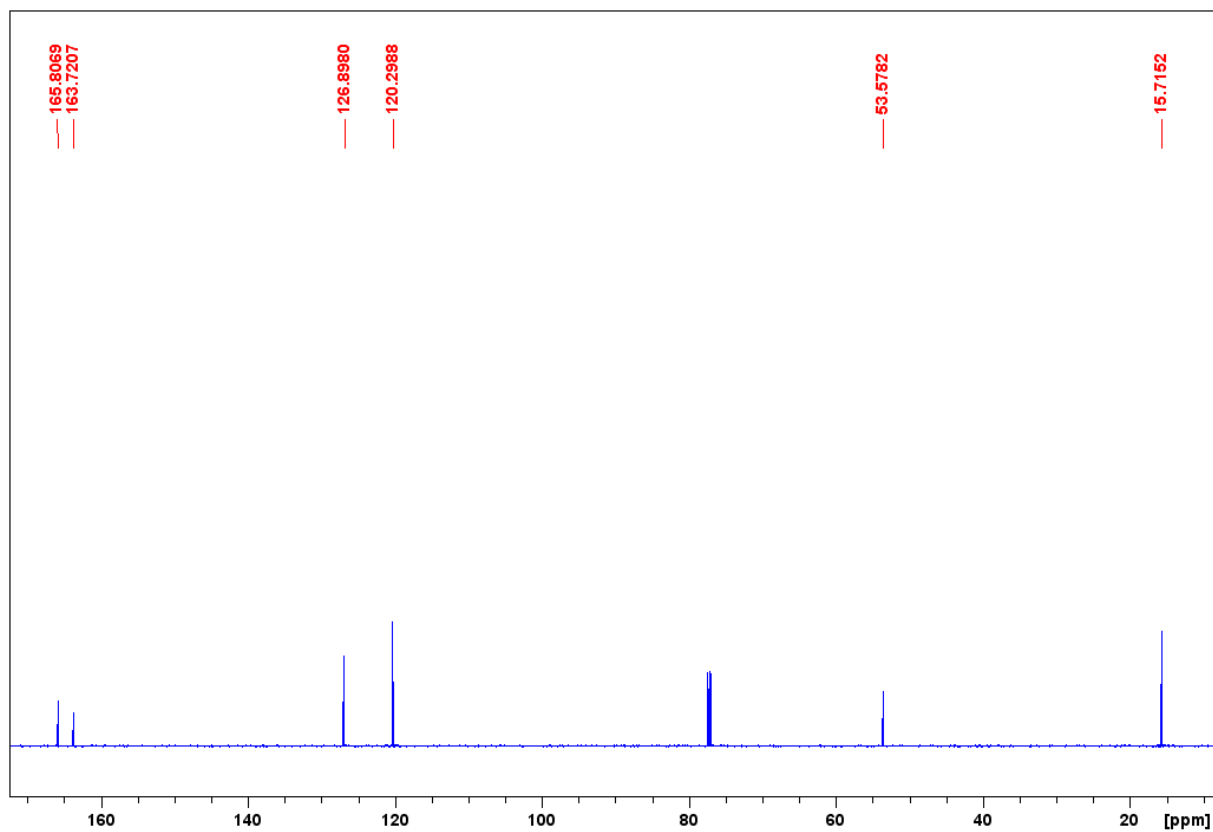

<sup>13</sup>C NMR spectrum of compound 10.

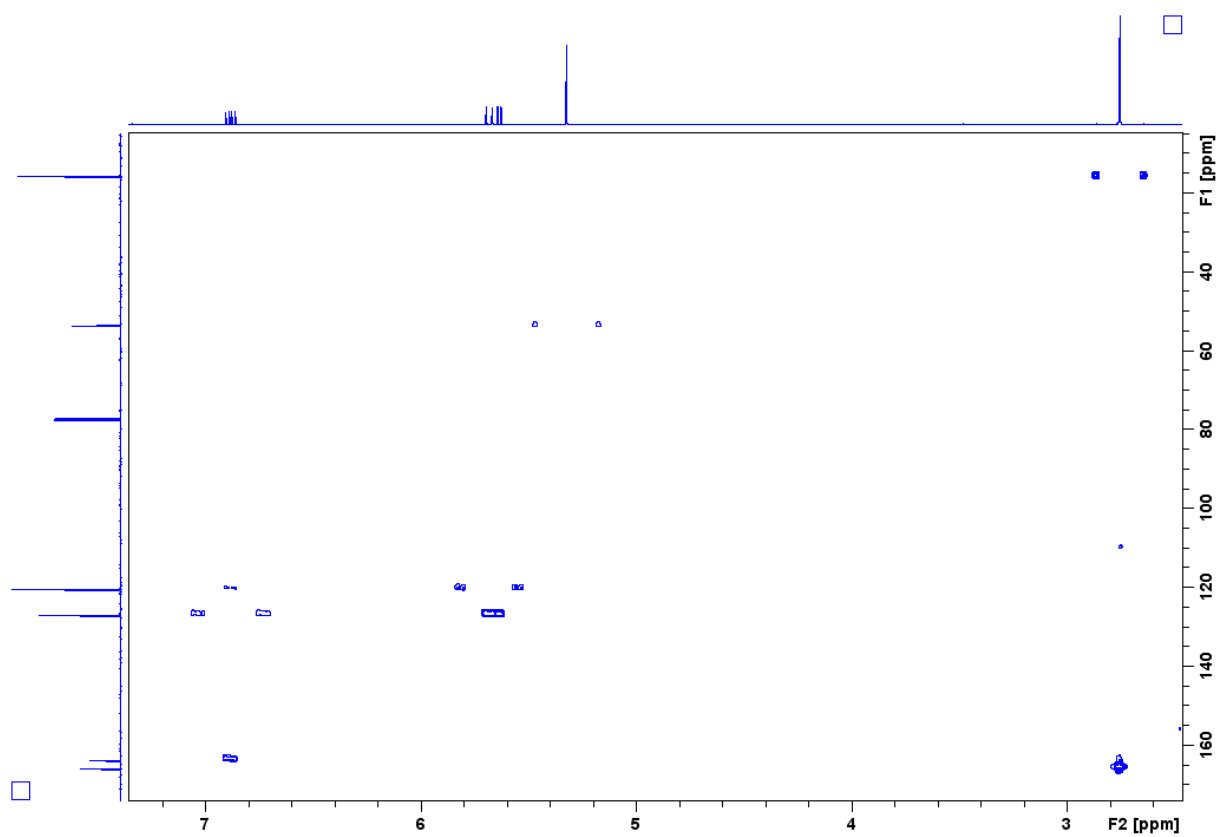

$^1\text{H}$ - $^{13}\text{C}$  HMBC spectrum of compound **10**.

### NMR spectra of compound **2b**

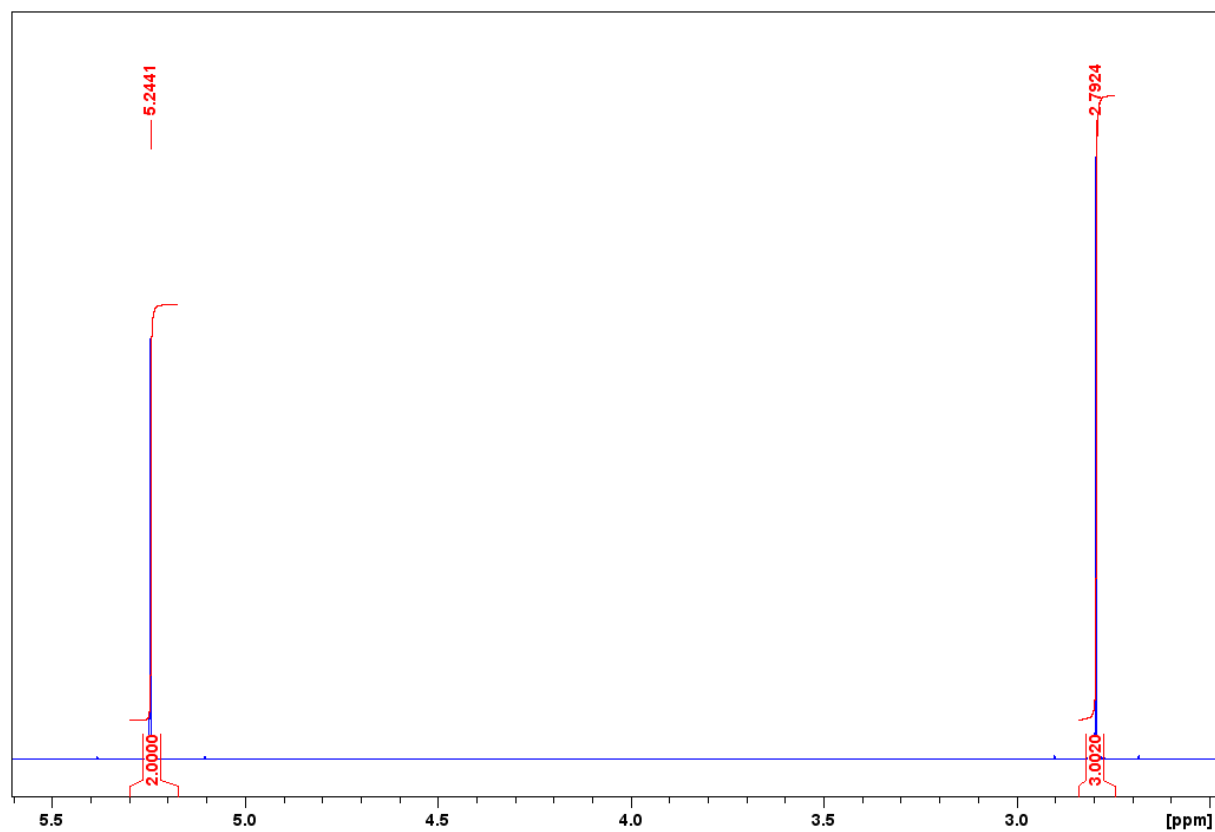

$^1\text{H}$  NMR spectrum of compound **2b**.

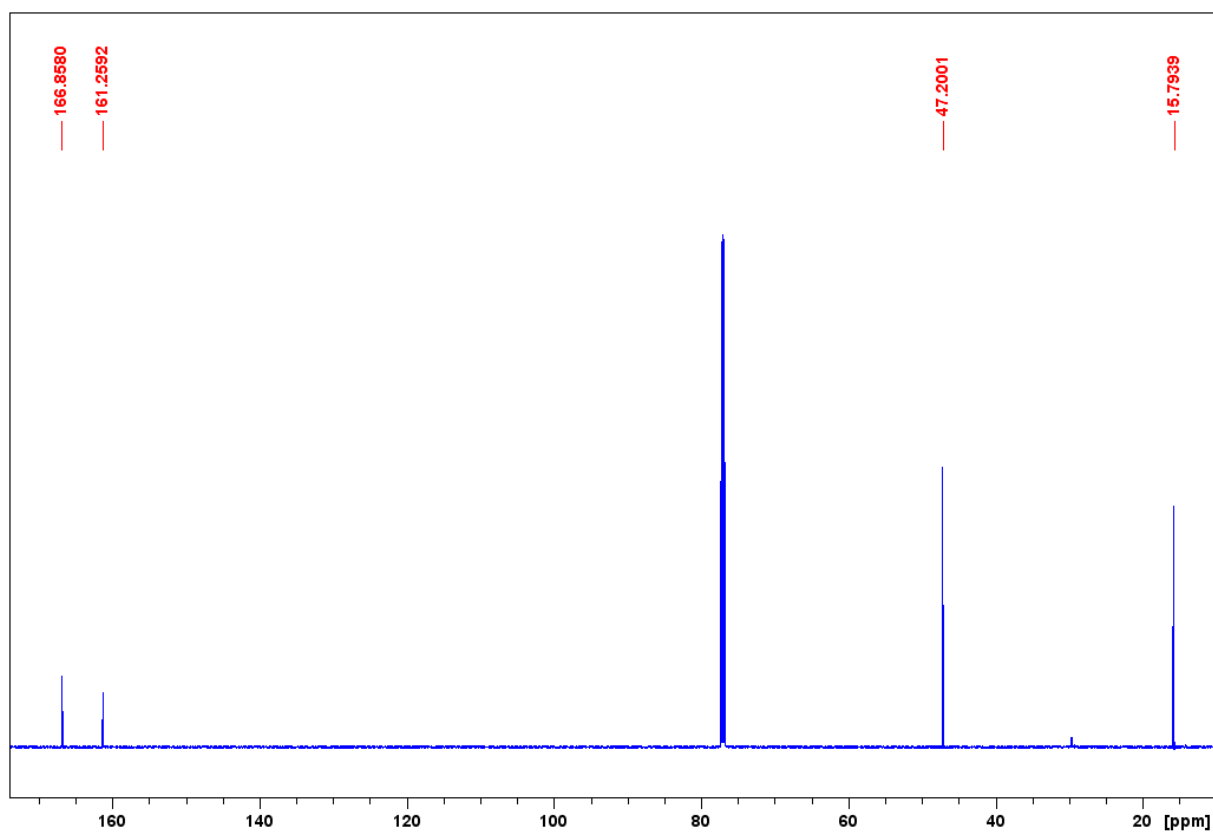

$^{13}\text{C}$  NMR spectrum of compound **2b**.

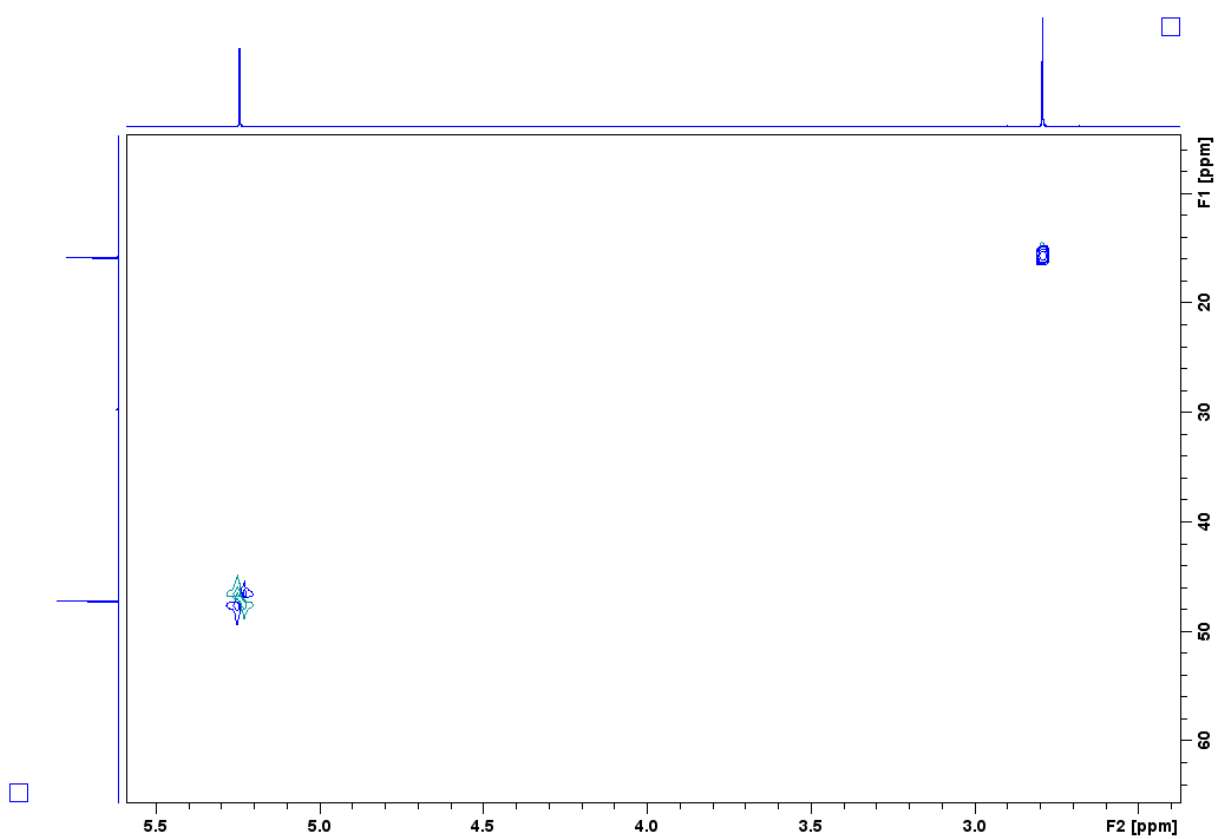

$^1\text{H}$ - $^{13}\text{C}$  HSQC spectrum of compound **2b**.

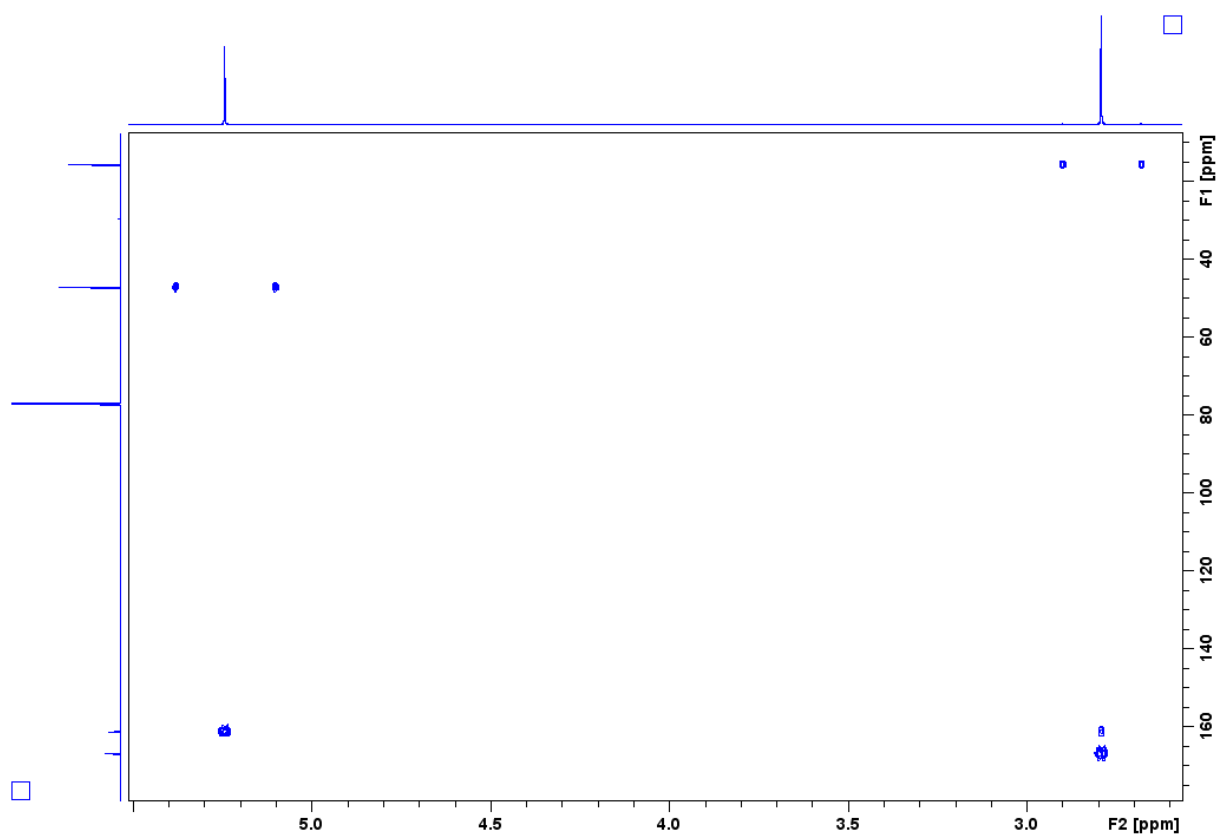

$^1\text{H}$ - $^{13}\text{C}$  HMBC spectrum of compound **2b**.

### NMR spectra of compound **4b**

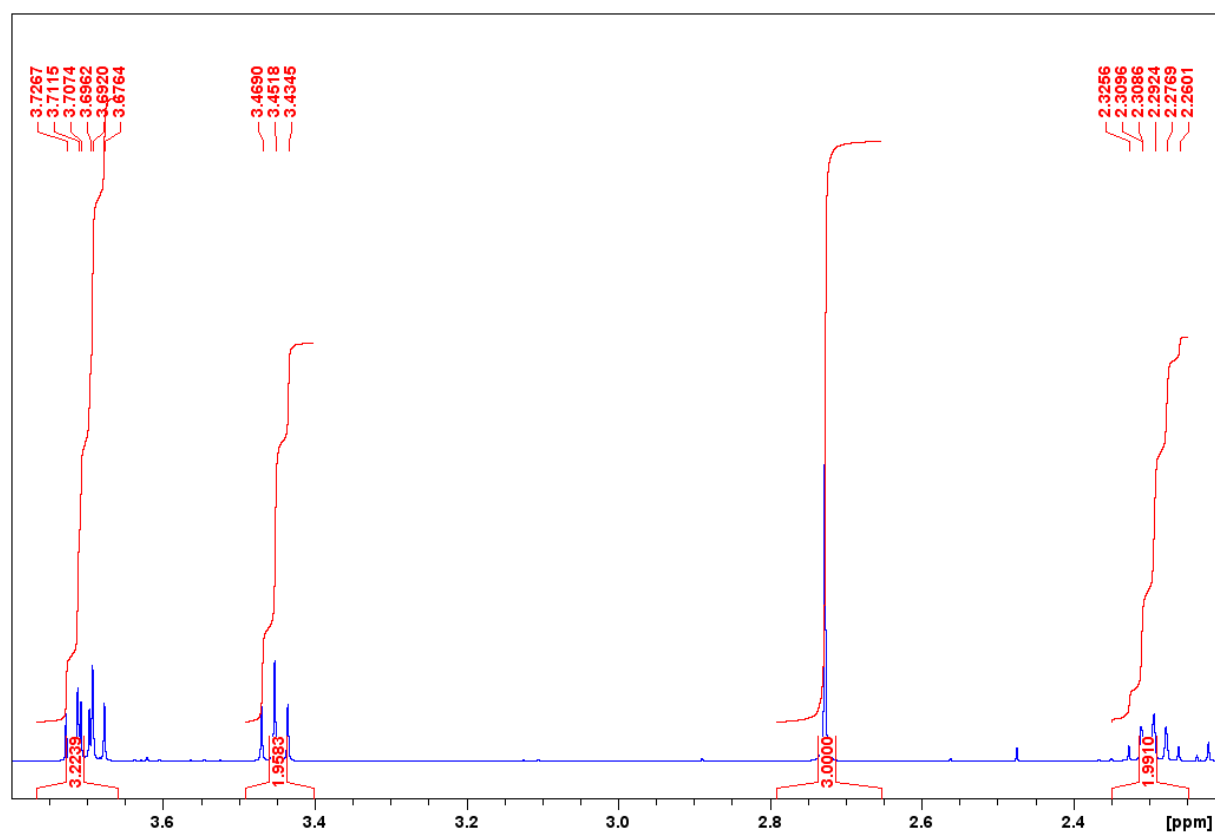

$^1\text{H}$  NMR spectrum of compound **4b**.

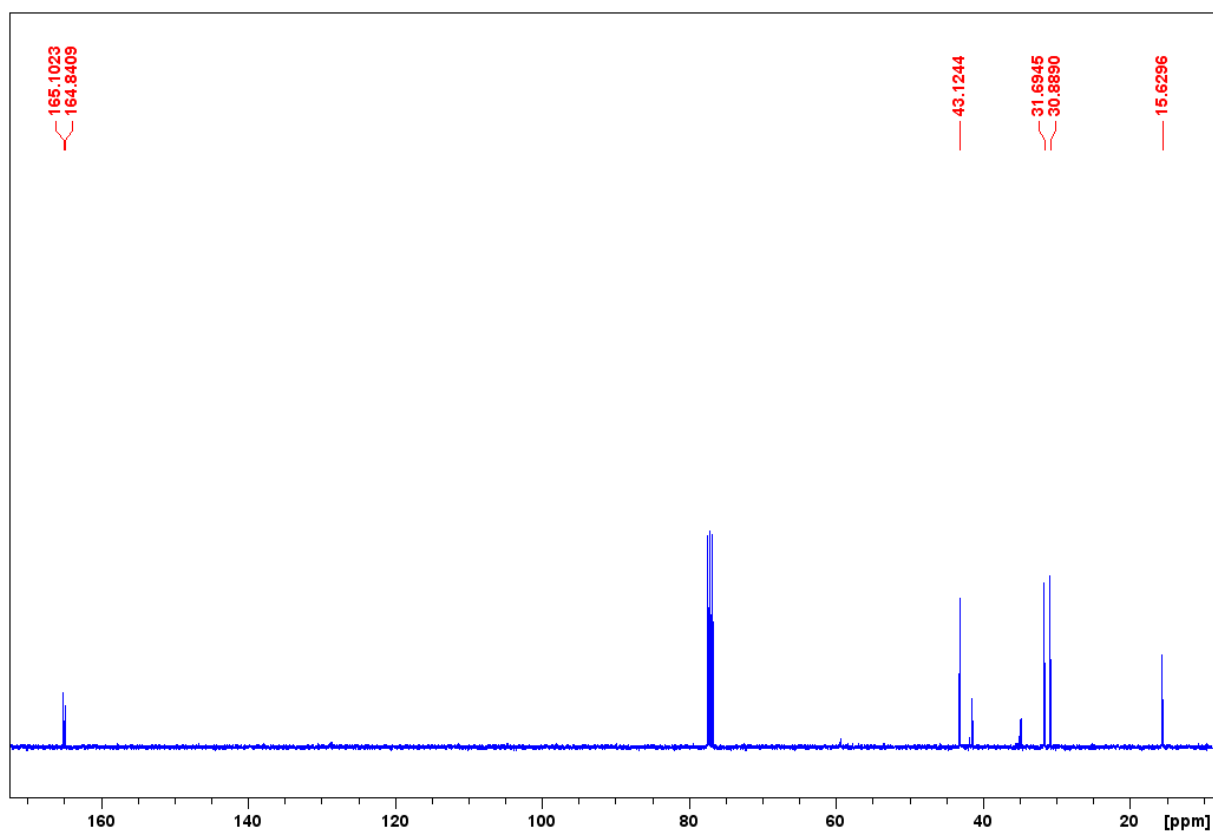

<sup>13</sup>C NMR spectrum of compound **4b**.

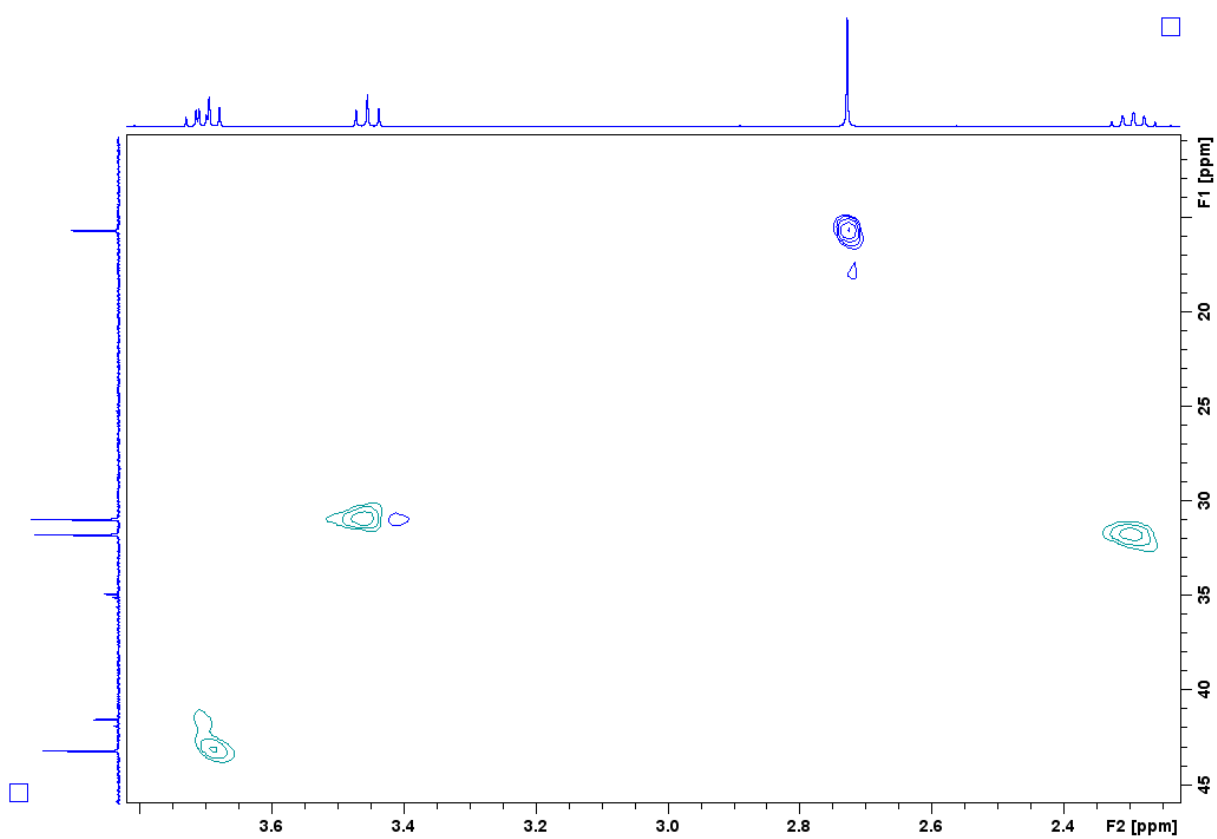

<sup>1</sup>H-<sup>13</sup>C HSQC spectrum of compound **4b**.

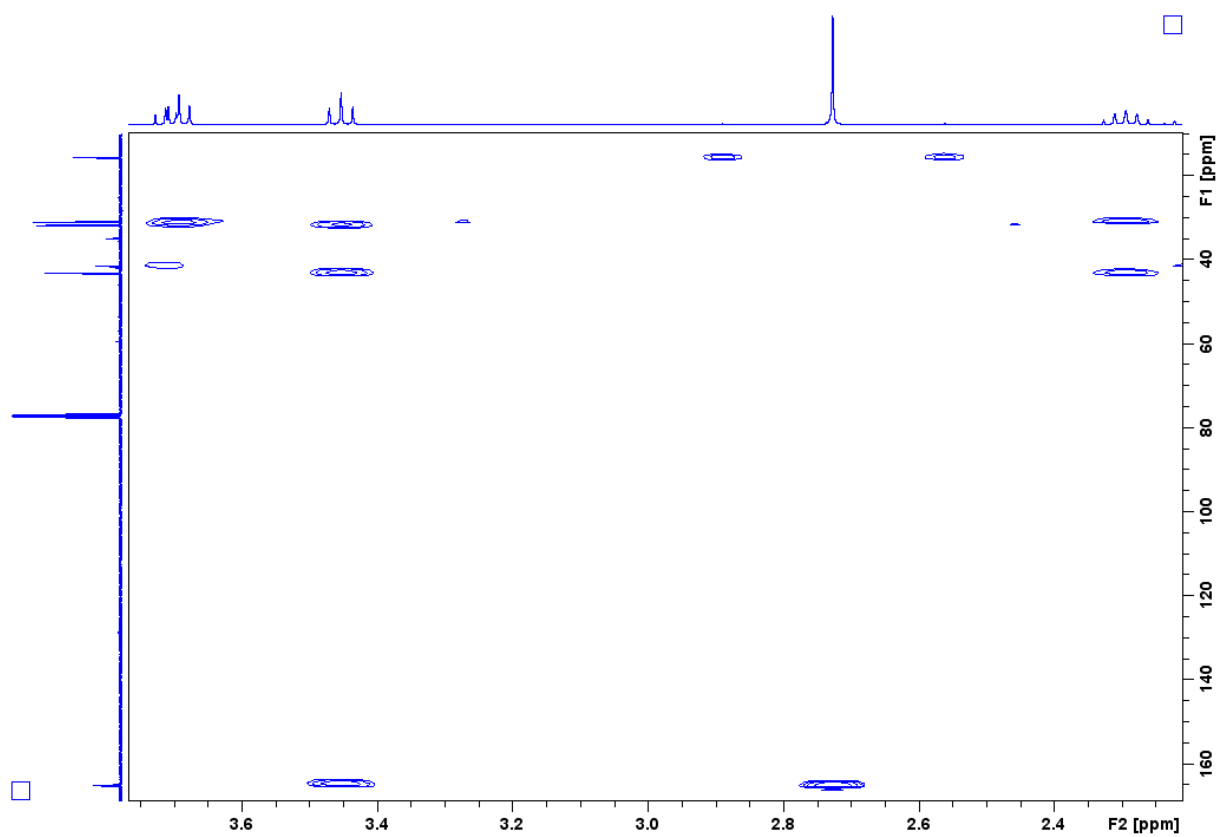

$^1\text{H}$ - $^{13}\text{C}$  HMBC spectrum of compound **4b**.

### NMR spectra of compound **5b**

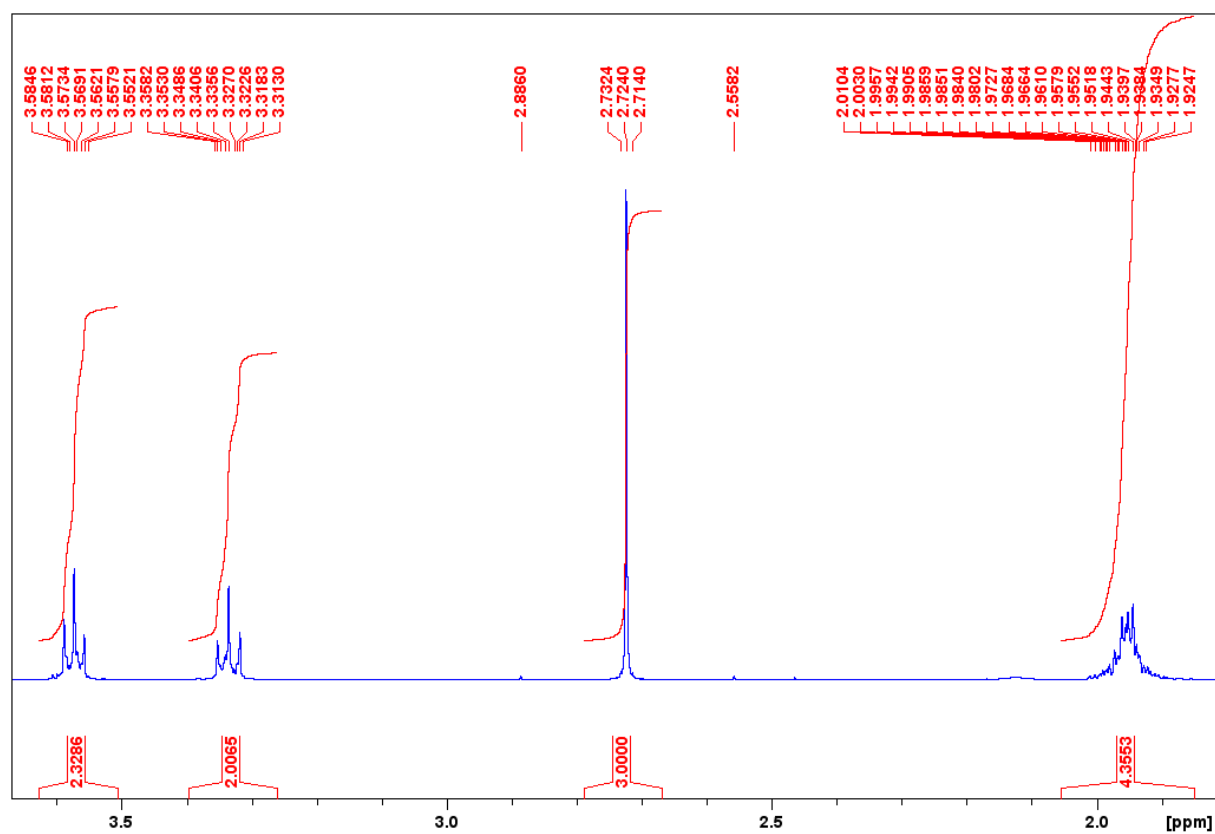

$^1\text{H}$  NMR spectrum of compound **5b**.

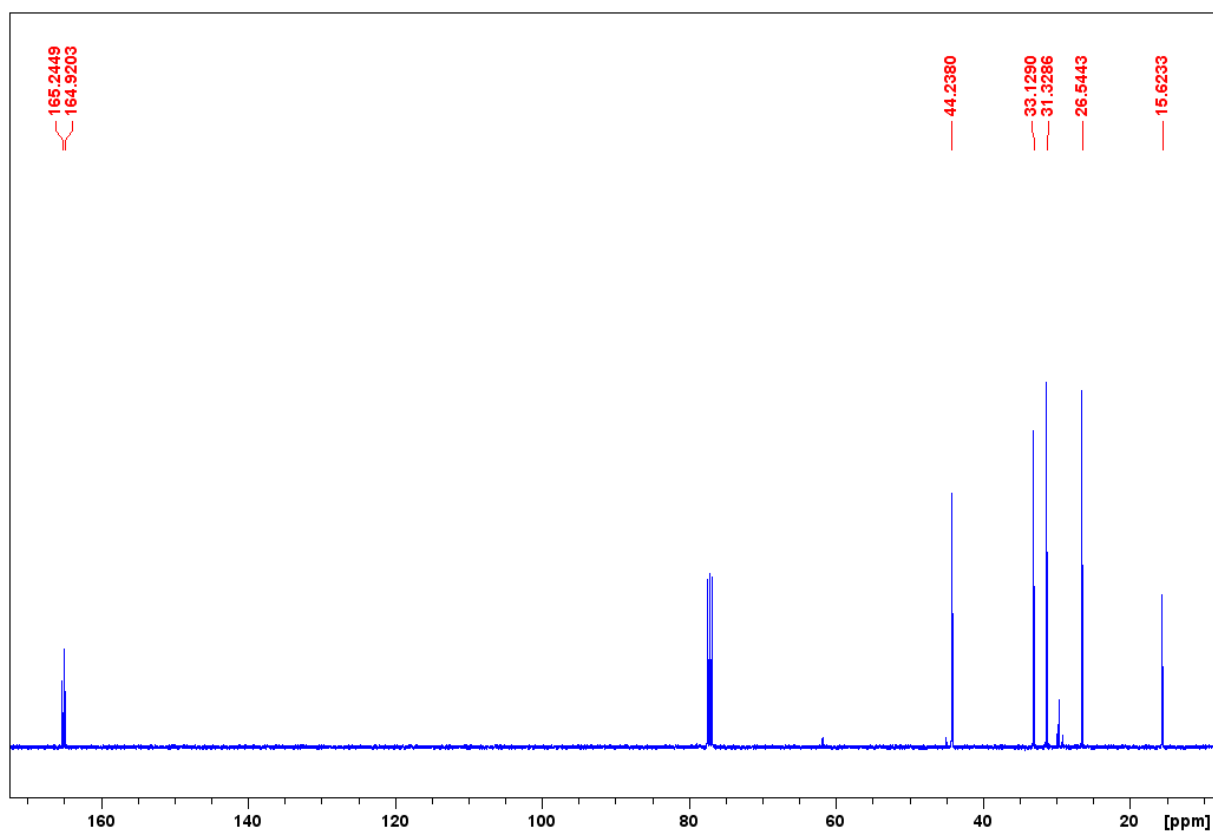

<sup>13</sup>C NMR spectrum of compound **5b**.

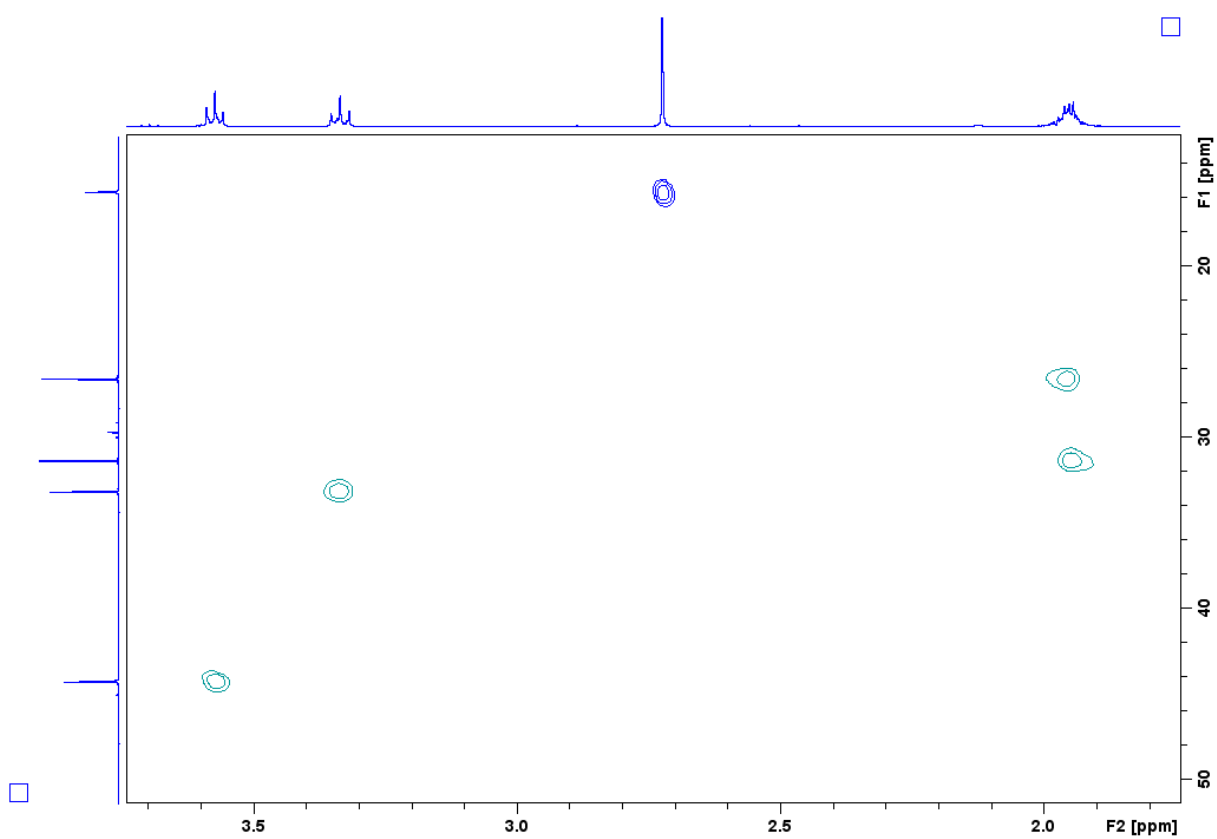

<sup>1</sup>H-<sup>13</sup>C HSQC spectrum of compound **5b**.



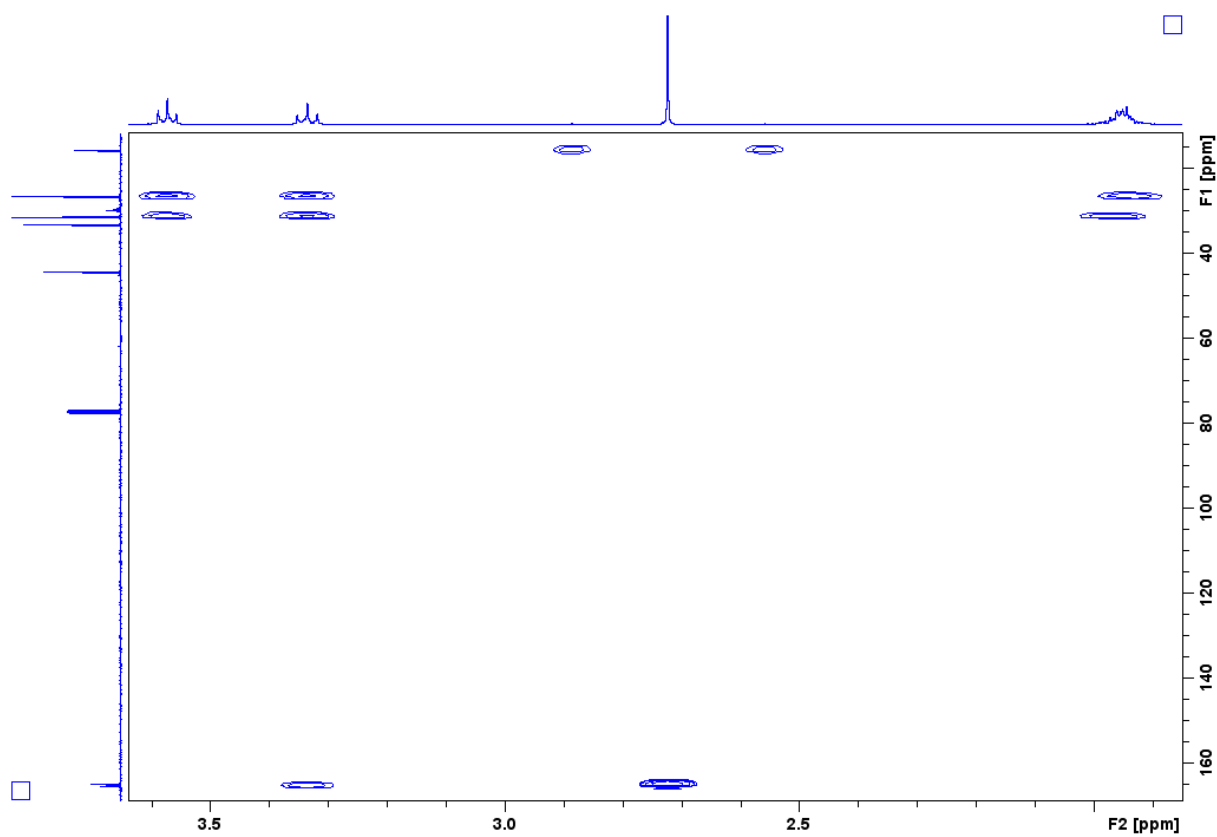

$^1\text{H}$ - $^{13}\text{C}$  HMBC spectrum of compound **5b**.

### IR (ATR) spectra of the products

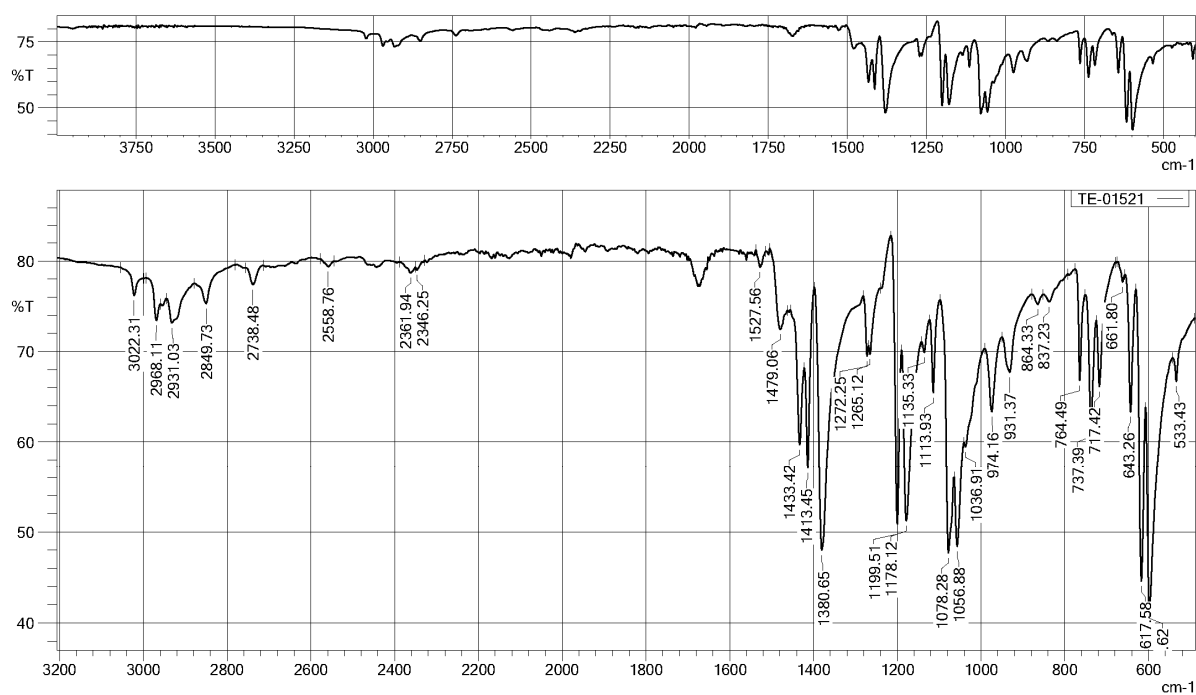

IR (ATR) spectrum of bromide **3a**.

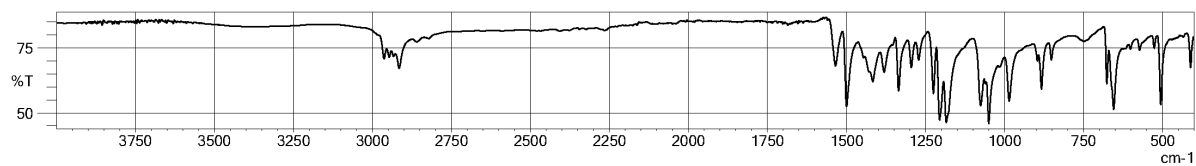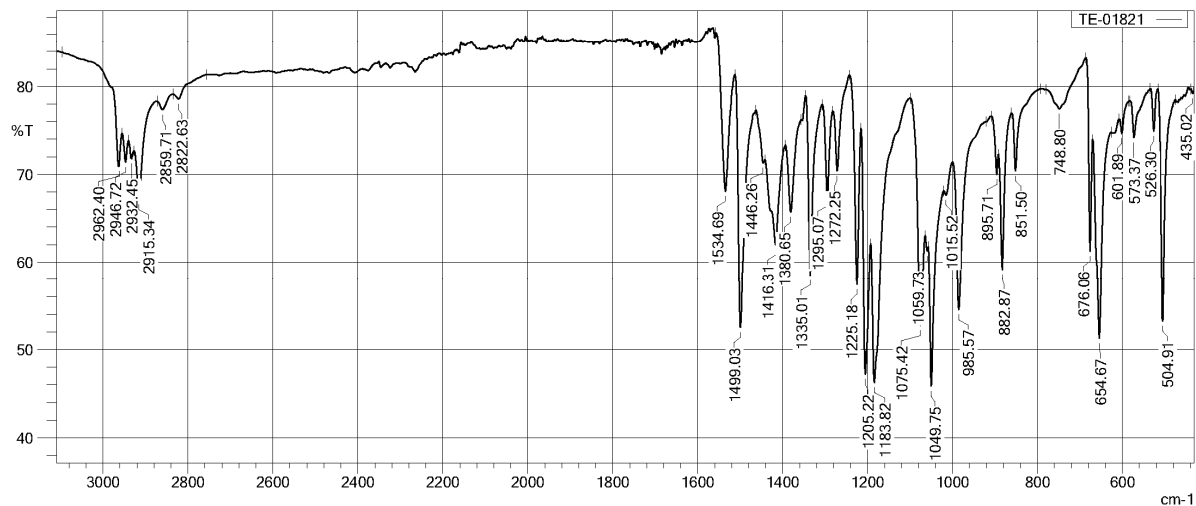

IR (ATR) spectrum of bromide **4a**.

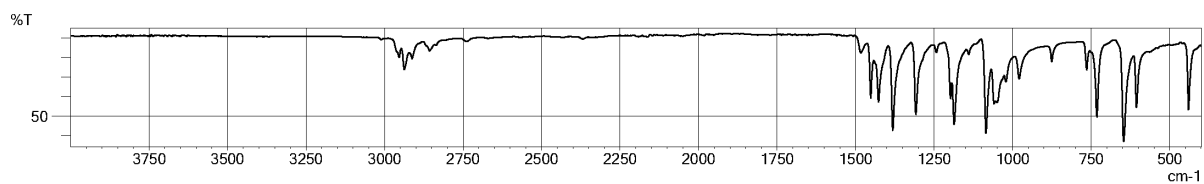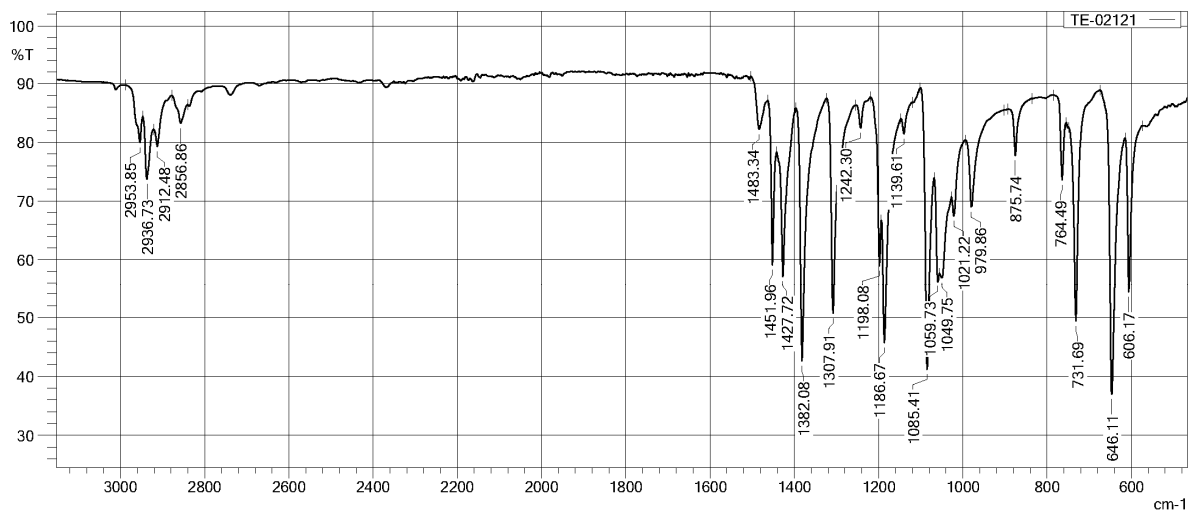

IR (ATR) spectrum of bromide **5a**.

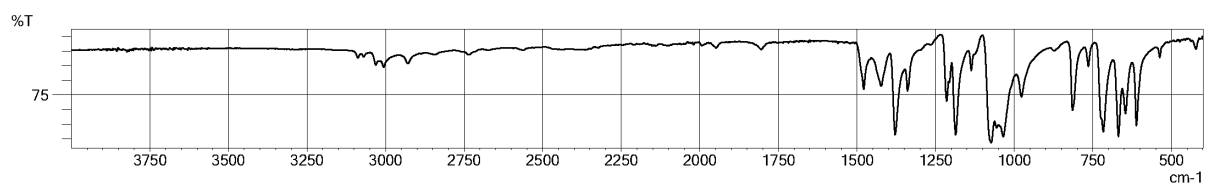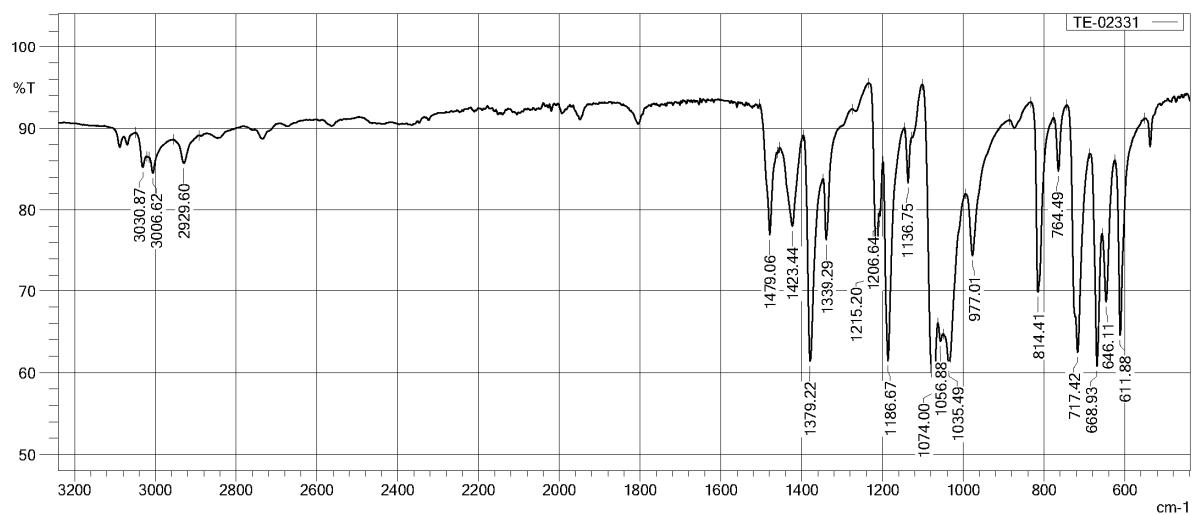

IR (ATR) spectrum of the ligand 6.

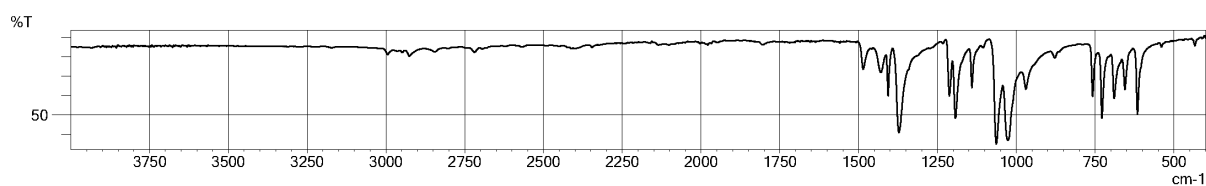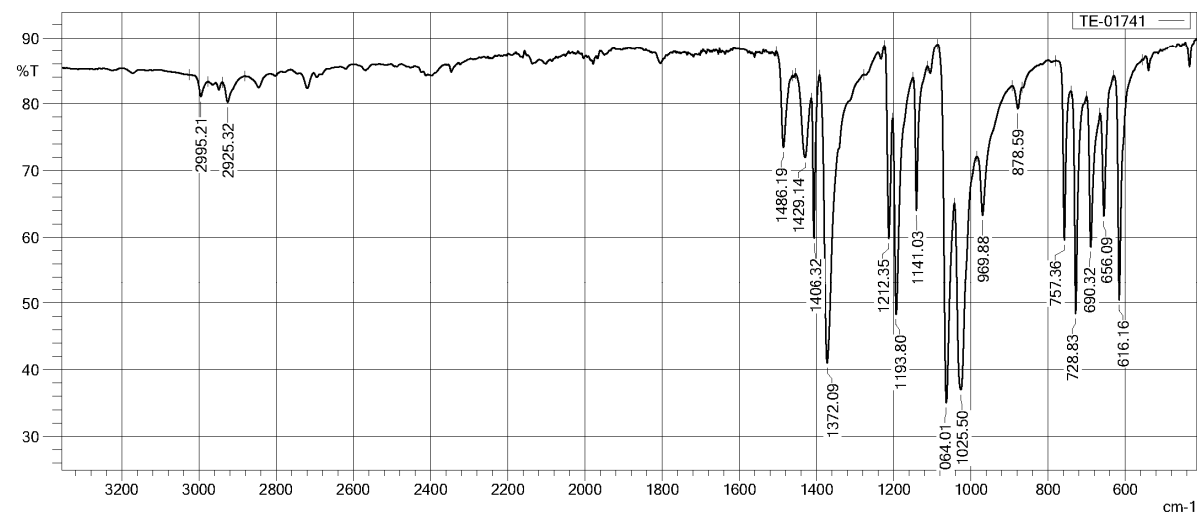

IR (ATR) spectrum of the ligand 7.

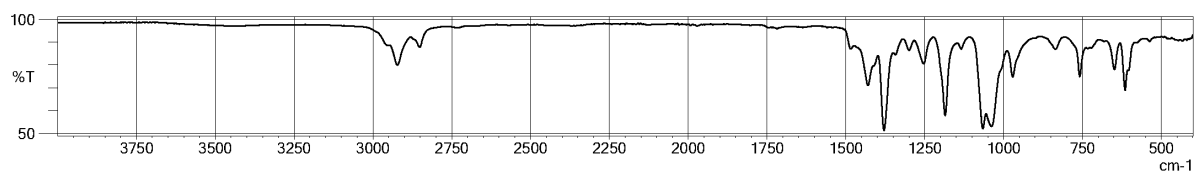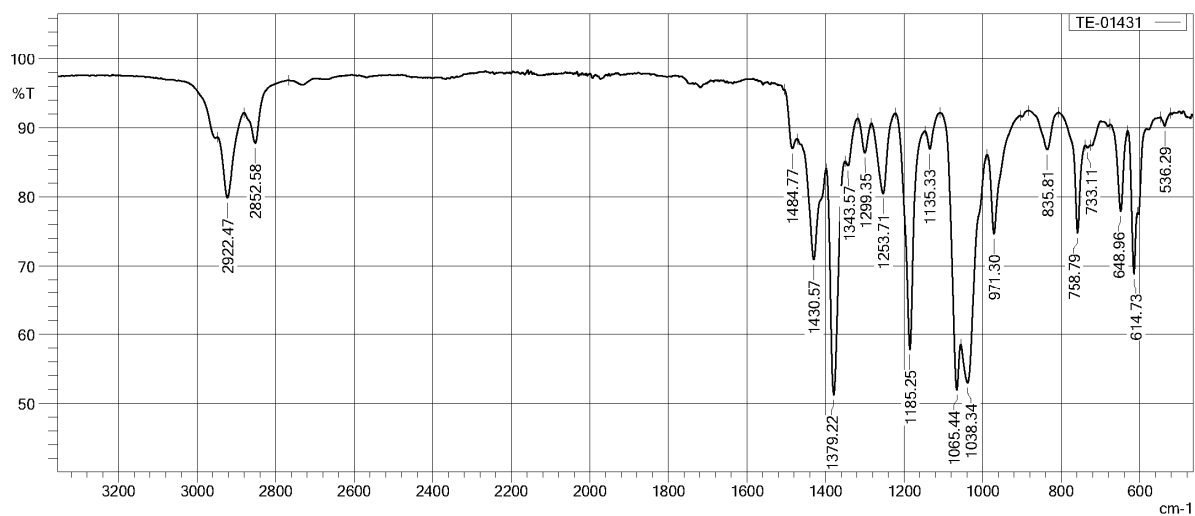

IR (ATR) spectrum of the ligand **8**.

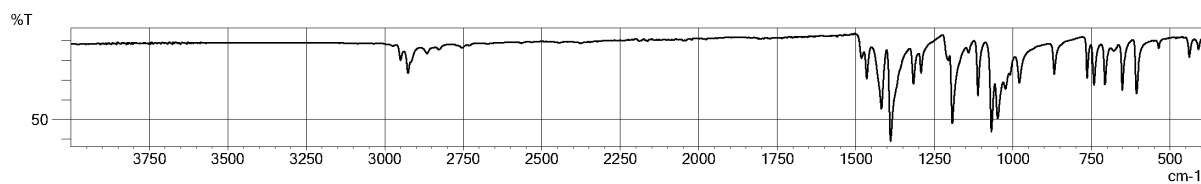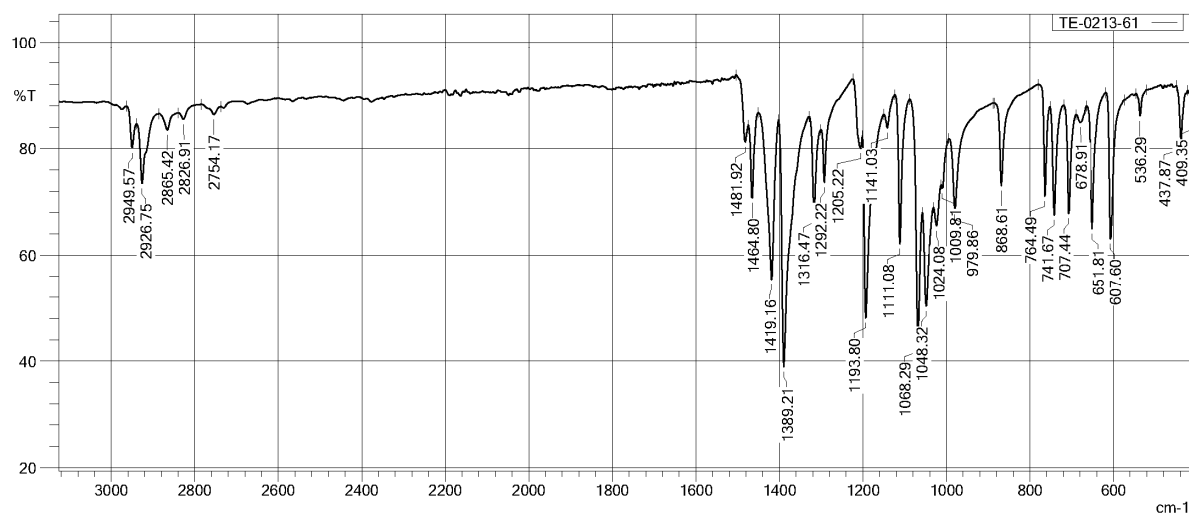

IR (ATR) spectrum of ligand **9**.

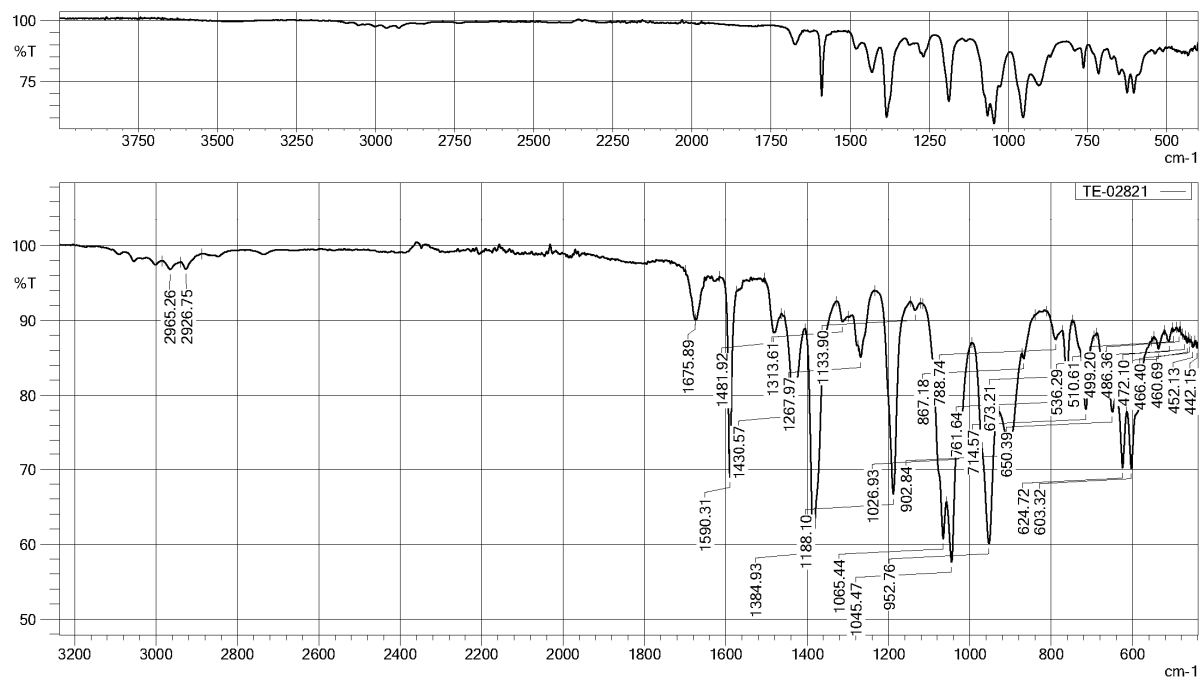

IR (ATR) spectrum of olefin **10**.

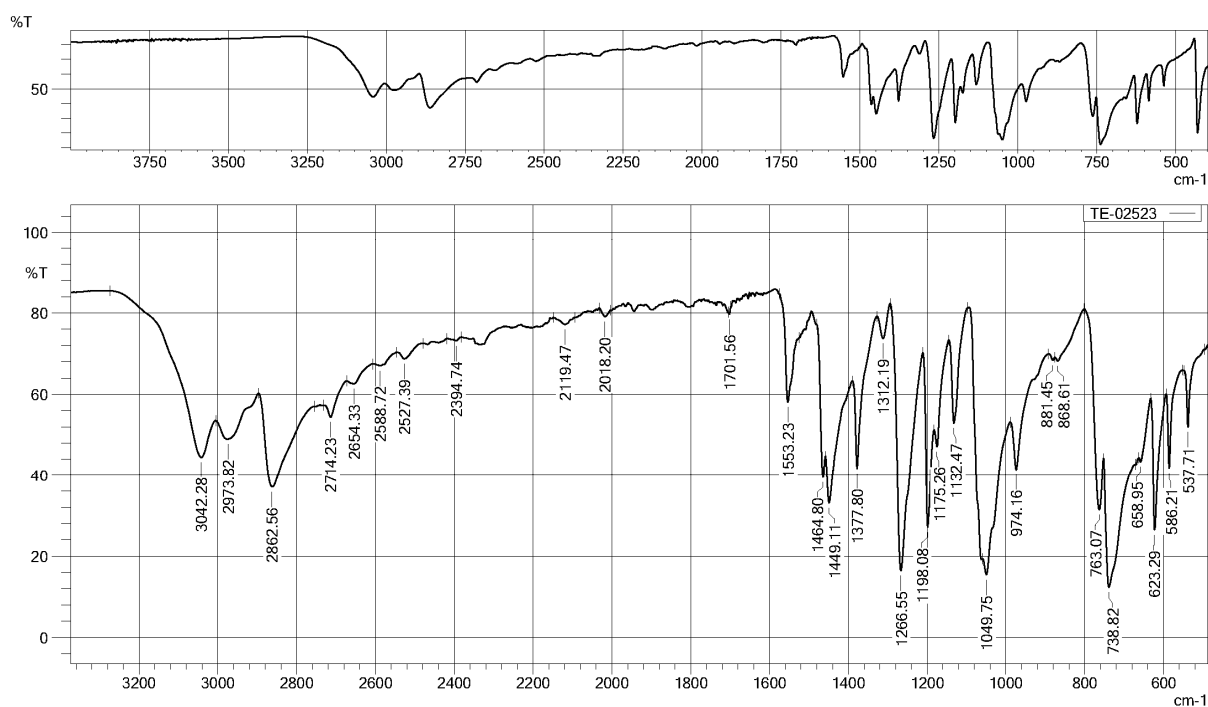

IR (ATR) spectrum of chloride **2b**.

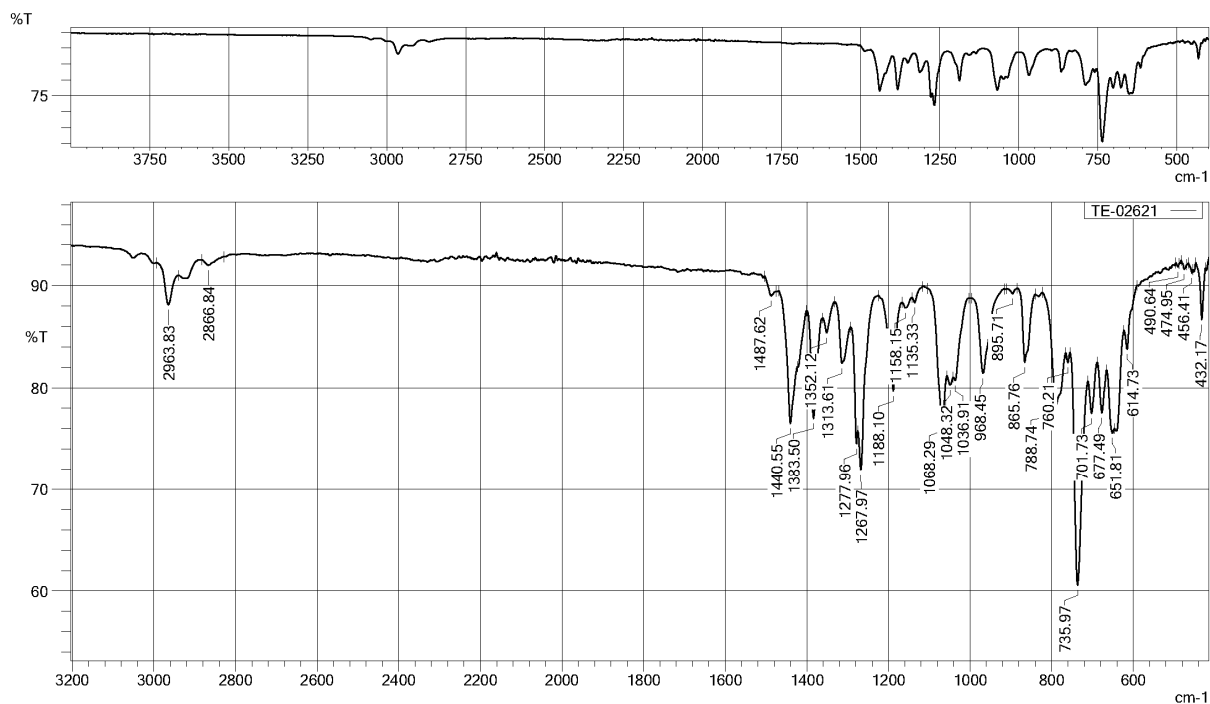

IR (ATR) spectrum of chloride **4b**.

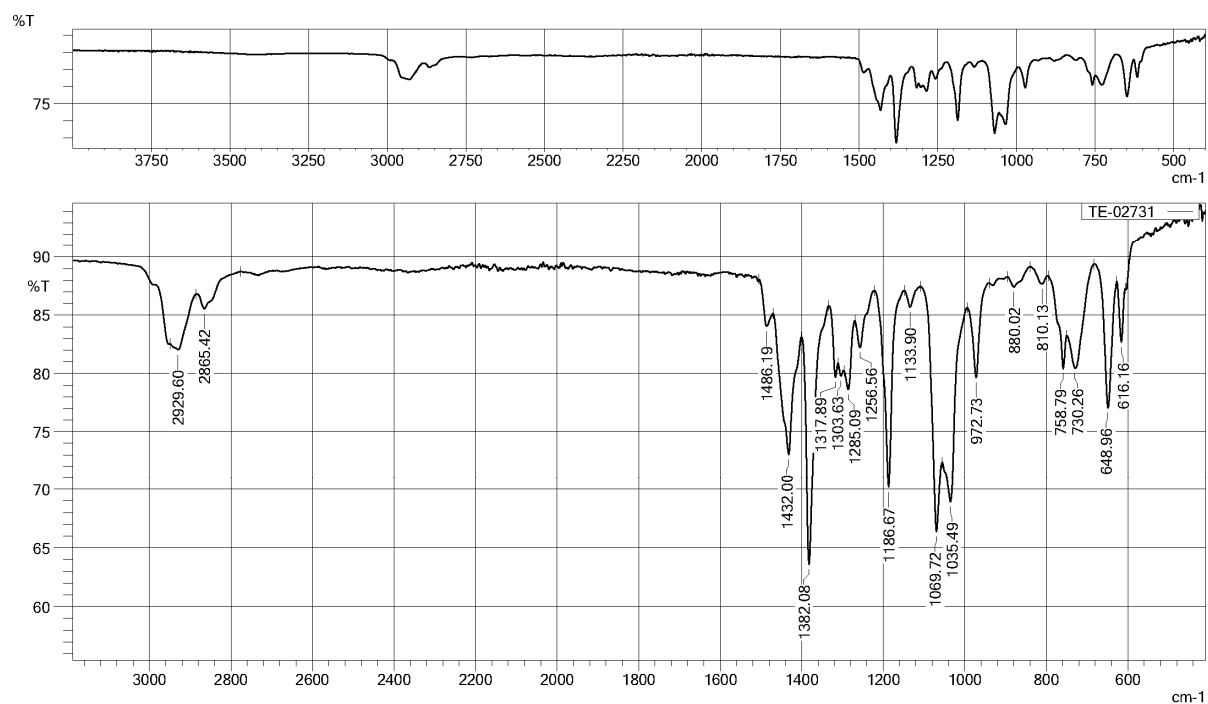

IR (ATR) spectrum of chloride **5b**.

## HR-MS (HESI<sup>+</sup>) spectra of the products

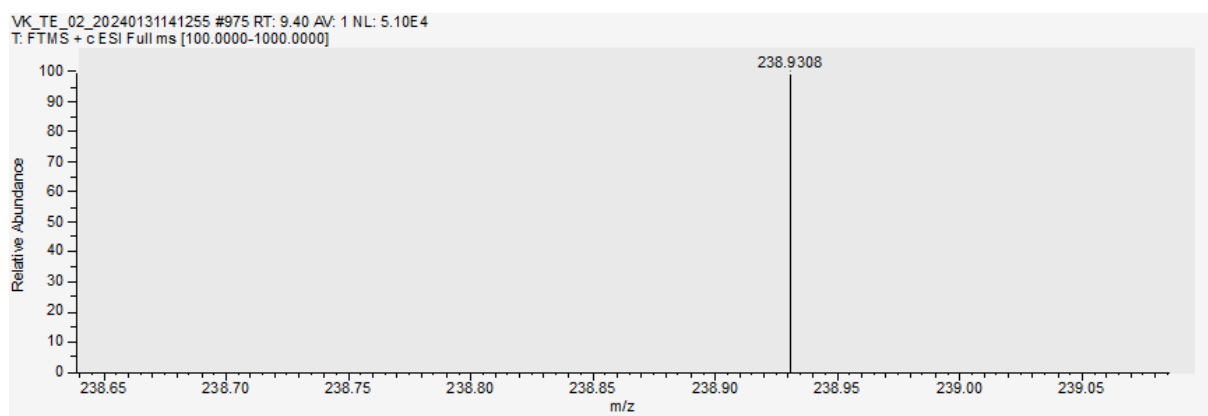

## HR-MS (HESI<sup>+</sup>) spectrum of bromide **3a**.

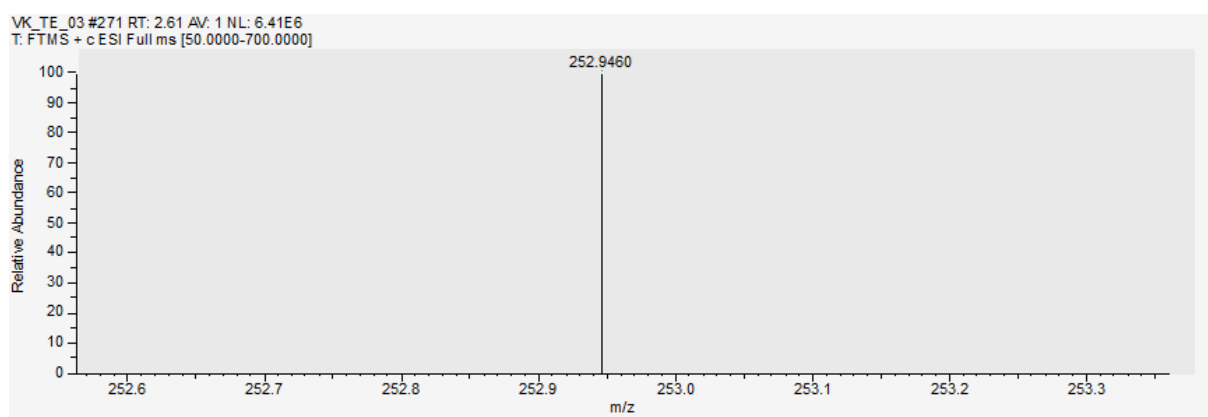

## HR-MS (HESI<sup>+</sup>) spectrum of bromide **4a**.

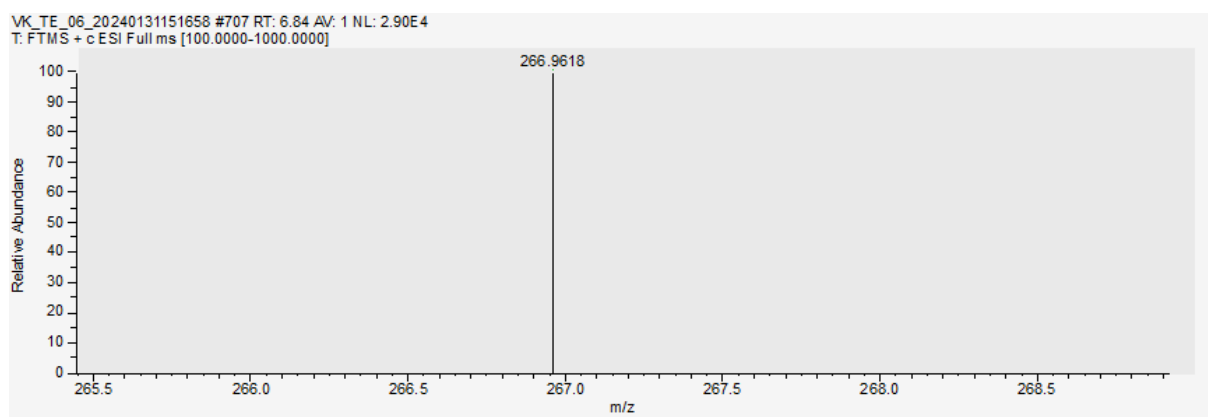

## HR-MS (HESI<sup>+</sup>) spectrum of bromide **5a**.

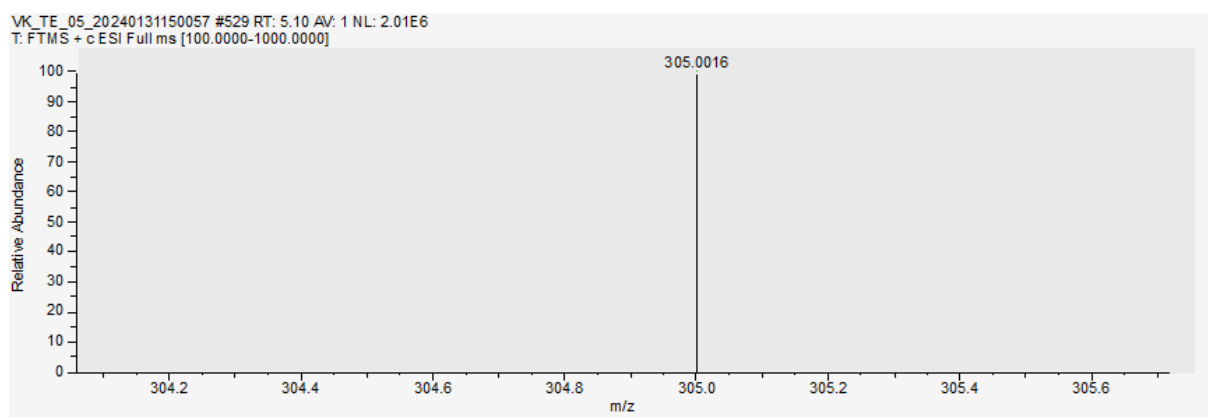

HR-MS (HESI<sup>+</sup>) spectrum of the ligand **8**.

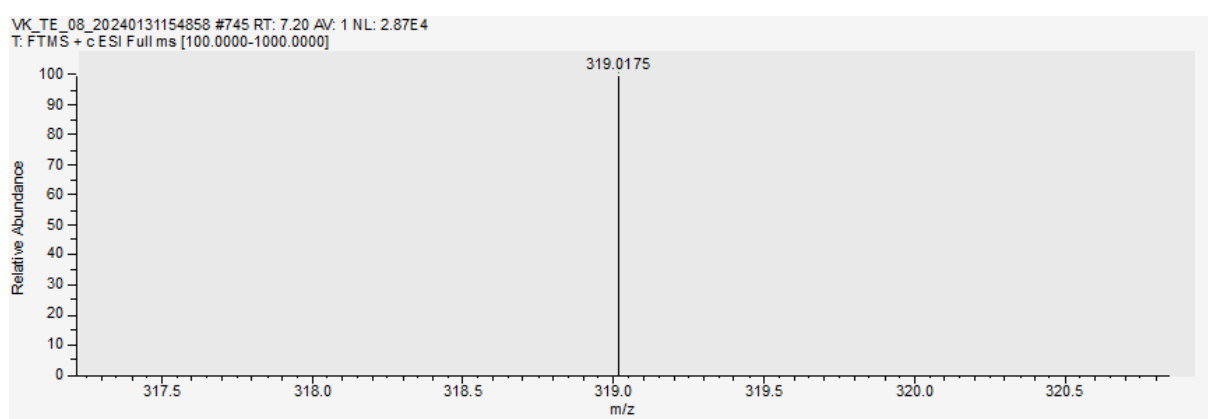

HR-MS (HESI<sup>+</sup>) spectrum of the ligand **9**.

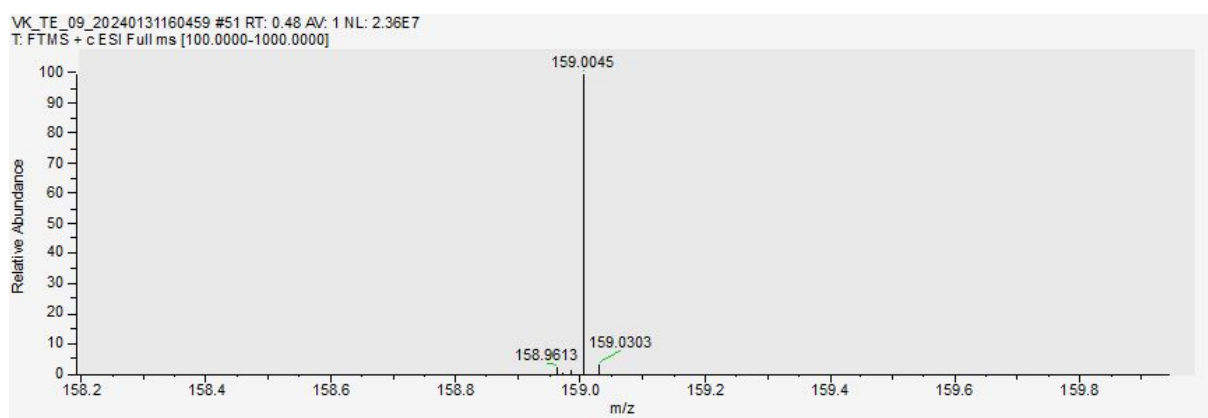

HR-MS (HESI<sup>+</sup>) spectrum of olefin **10**.



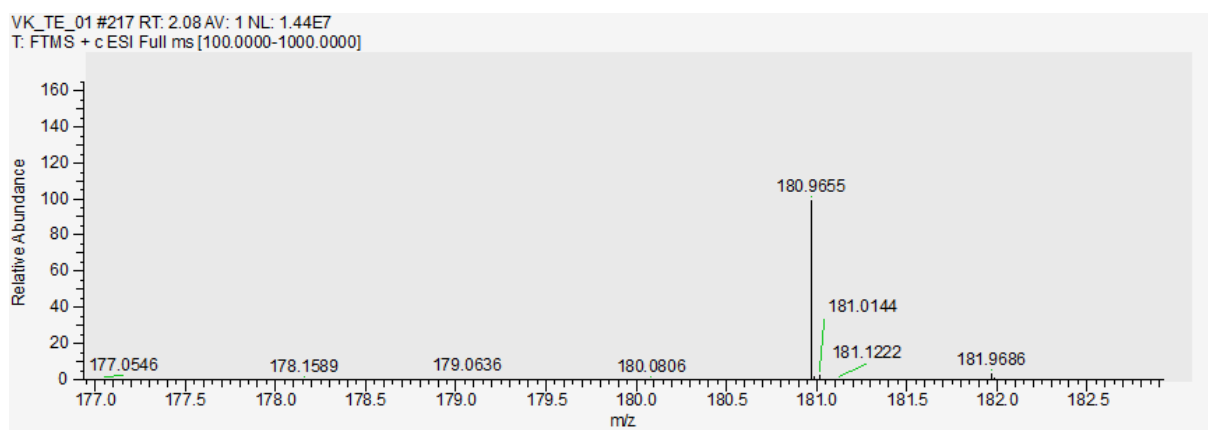

HR-MS (HESI<sup>+</sup>) spectrum of chloride **2b**.

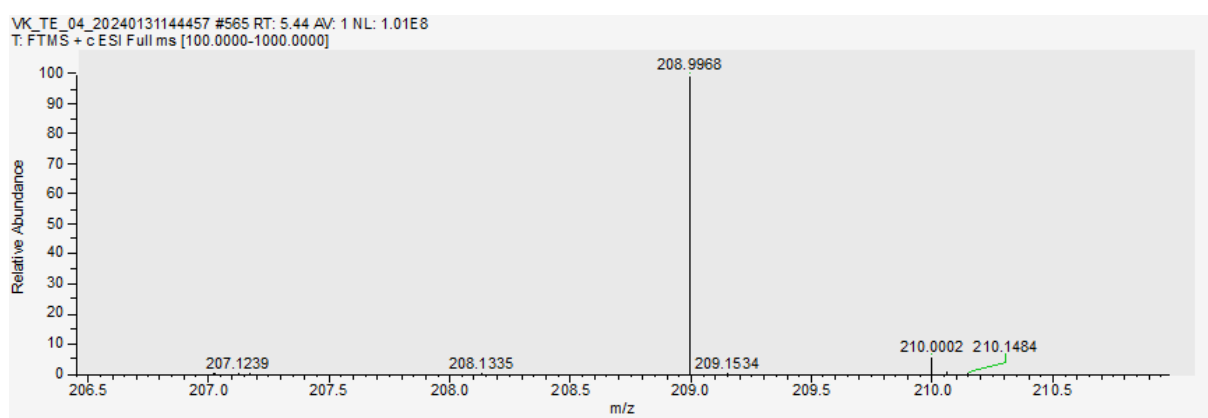

HR-MS (HESI<sup>+</sup>) spectrum of chloride **4b**.

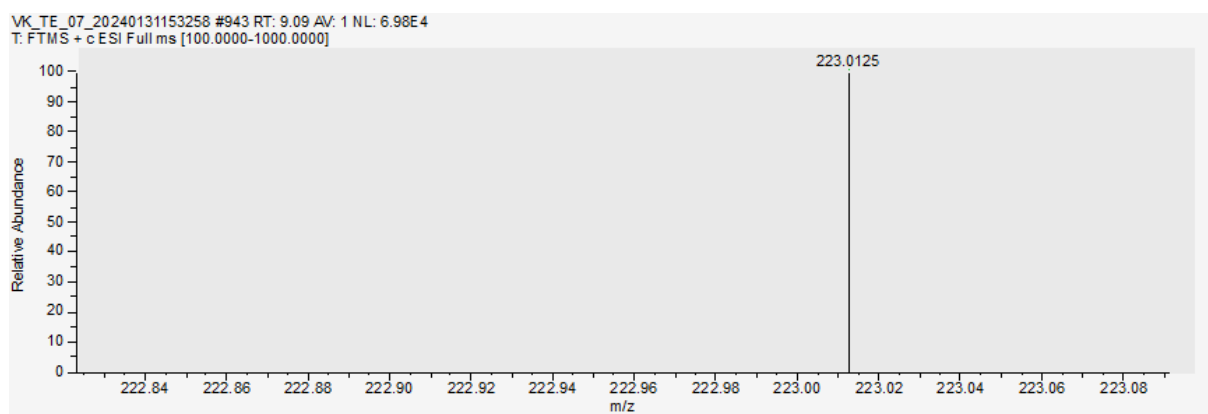

HR-MS (HESI<sup>+</sup>) spectrum of chloride **5b**.
